# Supplementary material for: Reactions of water with radical cations of guanine, 9-methylguanine, 2′-deoxyguanosine and guanosine: keto–enol isomerization, C8-hydroxylation, and effects of N9-substitution
Source: Royal Society of Chemistry journal article supplement (doi:10.1039/c8cp05453c), 2018-01-01
Supplement: c8cp05453c1.zip [file c8cp05453c1.zip]

## Supporting Information

### Reactions of Water with Radical Cations of Guanine, 9-Methylguanine, 2'-Deoxyguanosine and Guanosine: Keto-Enol Isomerization, C8-Hydroxylation, and Effects of N9-Substitution

Yan Sun,<sup>ab</sup> Wenjing Zhou,<sup>a</sup> May Myat Moe,<sup>a</sup> and Jianbo Liu<sup>\*ab</sup>

<sup>a</sup> Department of Chemistry and Biochemistry, Queens College of the City University of New York,  
65-30 Kissena Blvd., Queens, NY 11367, USA

<sup>b</sup> Ph.D. Program in Chemistry, The Graduate Center of the City University of New York,  
365 5th Ave., New York, NY 10016, USA

#### Table of Contents

|         |                                                                                 |     |
|---------|---------------------------------------------------------------------------------|-----|
| Fig. S1 | Stable tautomers/rotamers of 9HG <sup>•+</sup> .....                            | S2  |
| Fig. S2 | Stable tautomers/rotamers of 9MG <sup>•+</sup> .....                            | S3  |
| Fig. S3 | Stable tautomers/rotamers of dGuo <sup>•+</sup> .....                           | S4  |
| Fig. S4 | Stable tautomers/rotamers of Guo <sup>•+</sup> .....                            | S5  |
|         | Cartesian coordinates for the structures of 9HG <sup>•+</sup> in Fig. S1 .....  | S6  |
|         | Cartesian coordinates for the structures of 9MG <sup>•+</sup> in Fig. S2 .....  | S7  |
|         | Cartesian coordinates for the structures of dGuo <sup>•+</sup> in Fig. S3 ..... | S8  |
|         | Cartesian coordinates for the structures of Guo <sup>•+</sup> in Fig. S4 .....  | S10 |
|         | Cartesian coordinates for the structures in Fig. 2 .....                        | S12 |
|         | Cartesian coordinates for the structures in Fig. 5 .....                        | S18 |
|         | Cartesian coordinates for the structures in Fig. 6 .....                        | S20 |

---

\*Corresponding author. E-mail: jianbo.liu@qc.cuny.edu. Telephone: 1-718-997-3271.

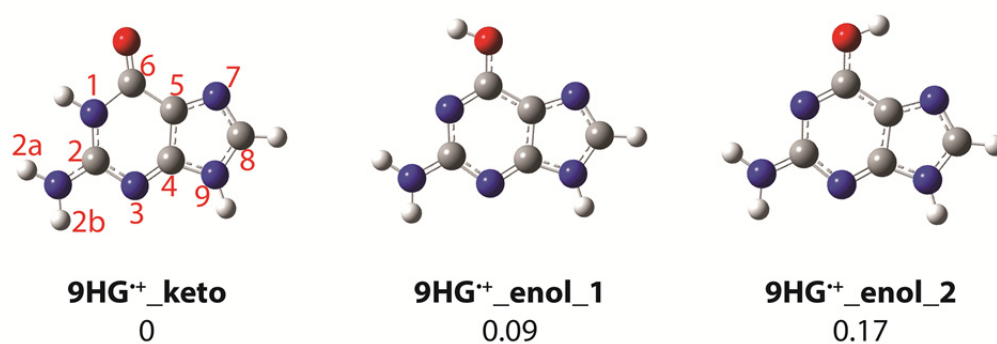

**Fig. S1** Low-lying tautomers and rotamers of 9HG<sup>+</sup>. Atomic numbering scheme and nomenclature are presented. Each conformer has a number suffix to denote the order of stability within its structure category. Relative energies (eV, with respect to global minima) were evaluated at  $\omega$ B97XD/6-31+G(d,p) with 298 K thermal corrections.

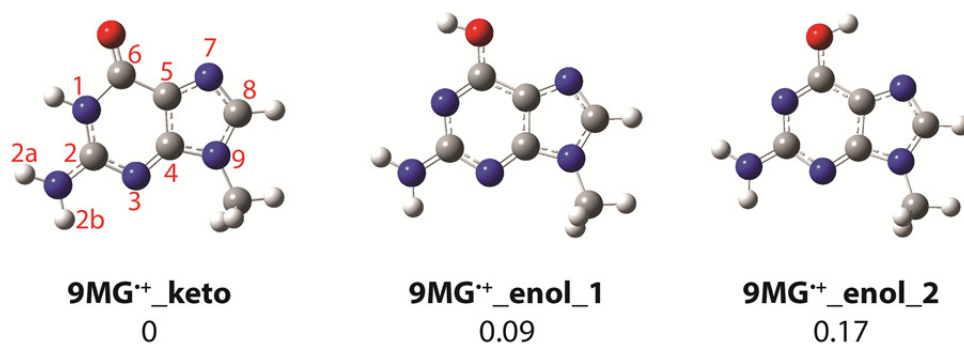

**Fig. S2** Low-lying tautomers and rotamers of 9MG<sup>+</sup>. Atomic numbering scheme and nomenclature are presented. Each conformer has a number suffix to denote the order of stability within its structure category. Relative energies (eV, with respect to global minima) were evaluated at  $\omega$ B97XD/6-31+G(d,p) with 298 K thermal corrections.

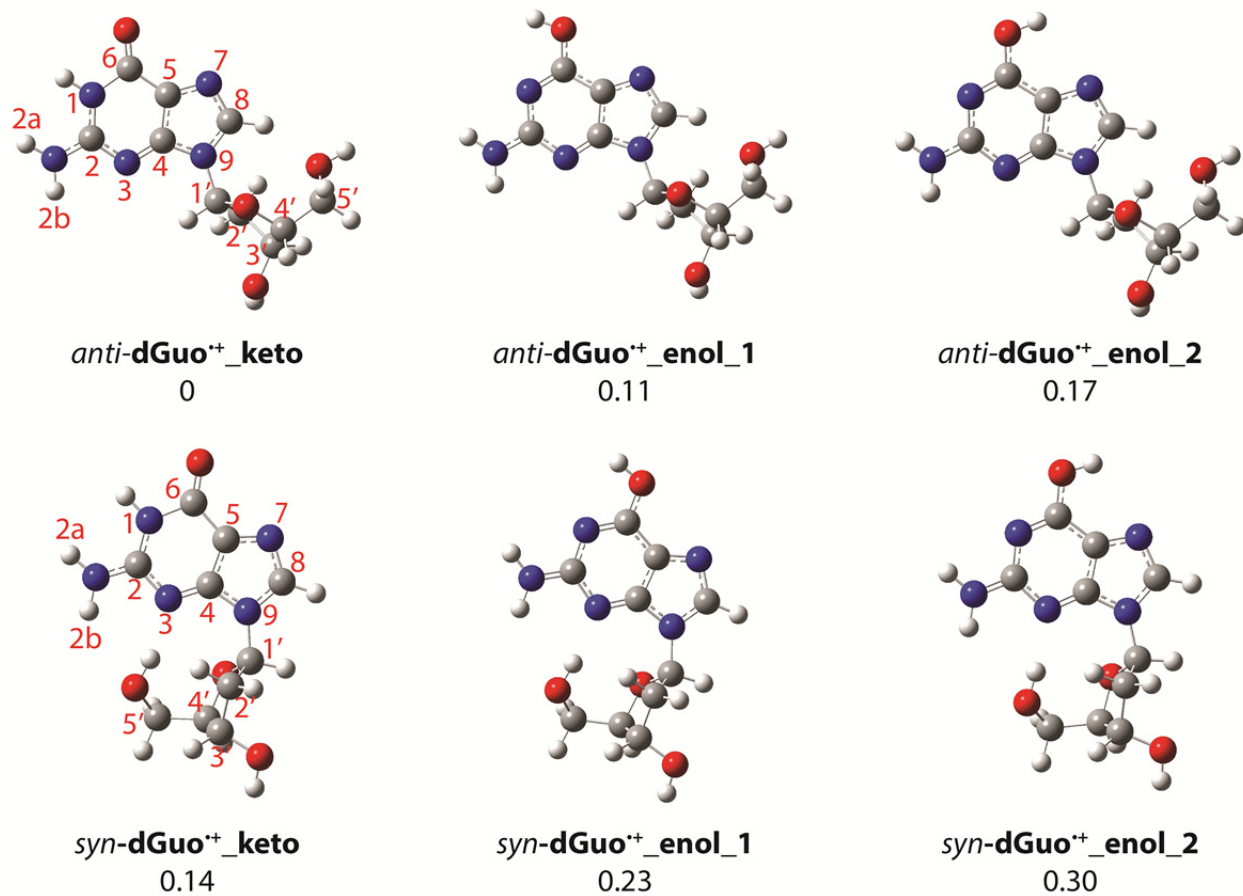

**Fig. S3** Low-lying tautomers and rotamers of  $\text{dGuo}^{\bullet+}$ . Atomic numbering scheme and nomenclature are presented. Each conformer has a number suffix to denote the order of stability within its structure category. Relative energies (eV, with respect to global minima) were evaluated at  $\omega\text{B97XD}/6\text{-}31\text{+G(d,p)}$  with 298 K thermal corrections.

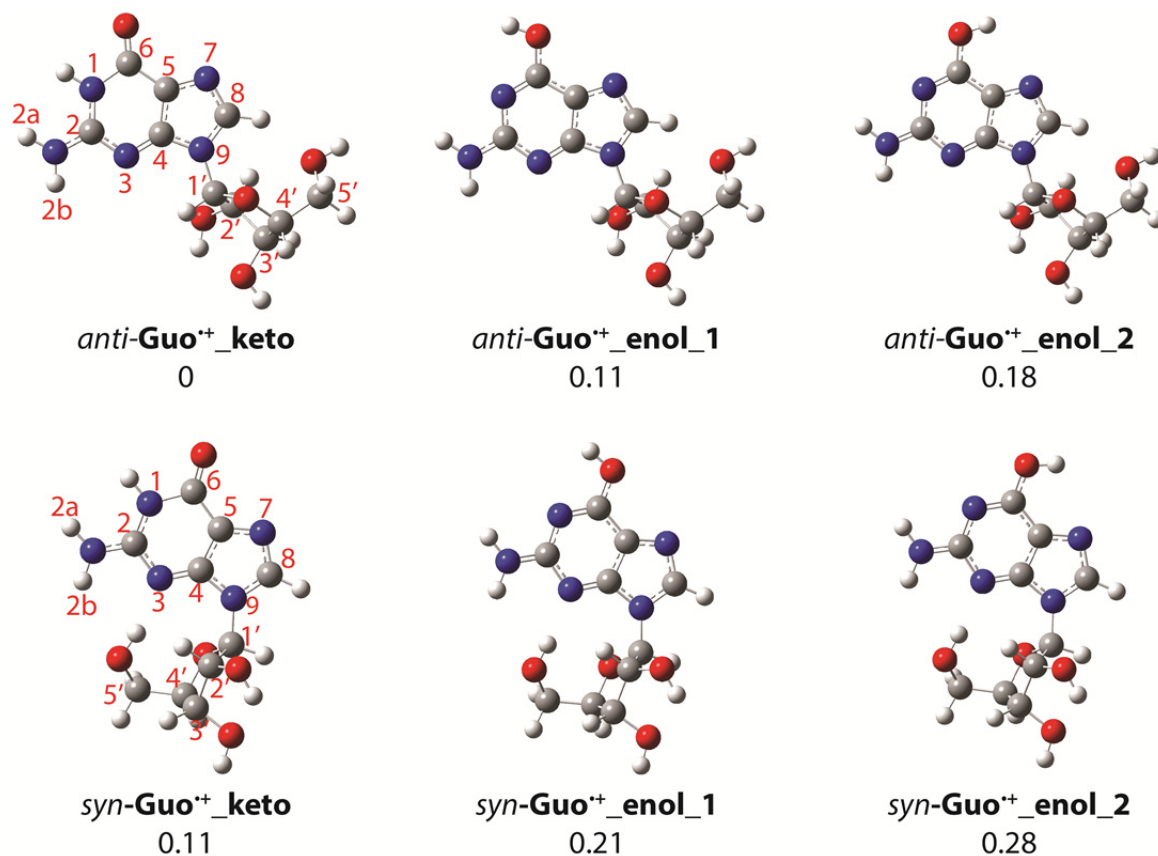

**Fig. S4** Low-lying tautomers and rotamers of Guo<sup>+</sup>. Atomic numbering scheme and nomenclature are presented. Each conformer has a number suffix to denote the order of stability within its structure category. Relative energies (eV, with respect to global minima) were evaluated at  $\omega$ B97XD/6-31+G(d,p) with 298 K thermal corrections.

**Cartesian coordinates for the structures in  
Fig. S1, optimized at  $\omega$ B97XD/6-31+G(d,p).**

H16 0.724357 2.912487 -0.000009

**9HG<sup>+</sup>\_keto**

C1 -0.246525 1.479497 0.000004  
C2 0.854816 0.518755 0.000002  
H3 -2.305573 1.419067 0.000005  
C4 -1.679426 -0.548633 0.000006  
C5 2.692392 -0.514115 -0.000013  
N6 -1.503772 0.796299 0.000005  
N7 2.171493 0.715558 -0.000015  
N8 1.751847 -1.500377 0.000006  
N9 -0.652665 -1.437674 0.000017  
C10 0.531203 -0.880468 0.000012  
N11 -2.901167 -1.058213 -0.000036  
H12 -2.995044 -2.065277 0.000073  
H13 -3.739392 -0.495433 -0.000028  
O14 -0.200466 2.678487 0.000007  
H15 3.753107 -0.726499 -0.000026  
H16 1.915718 -2.499117 0.000006

**9HG<sup>+</sup>\_enol\_1**

C1 -0.372887 1.332424 -0.000003  
C2 0.800774 0.493895 -0.000003  
C3 -1.656236 -0.574521 0.000006  
C4 2.680229 -0.458597 -0.000006  
N5 -1.560826 0.781169 0.000002  
N6 2.109729 0.751019 -0.000007  
N7 1.788705 -1.483340 -0.000001  
N8 -0.630503 -1.490286 0.000006  
C9 0.536193 -0.915212 0.000001  
N10 -2.874420 -1.085256 0.000011  
H11 -3.000036 -2.088901 0.000013  
H12 -3.678960 -0.472296 0.000012  
O13 -0.218106 2.625883 -0.000007  
H14 3.749442 -0.623487 -0.000008  
H15 1.998901 -2.473098 0.000001  
H16 -1.081726 3.069639 -0.000006

**9HG<sup>+</sup>\_enol\_2**

C1 -0.342277 1.345176 -0.000003  
C2 0.791115 0.453372 -0.000003  
C3 -1.685989 -0.511239 0.000005  
C4 2.648428 -0.543400 -0.000005  
N5 -1.545944 0.838292 0.000002  
N6 2.107499 0.679751 -0.000007  
N7 1.729204 -1.542183 0.000000  
N8 -0.697295 -1.474502 0.000005  
C9 0.488958 -0.942356 0.000001  
N10 -2.922661 -0.974183 0.000010  
H11 -3.091655 -1.971622 0.000012  
H12 -3.698690 -0.324001 0.000010  
O13 -0.207389 2.644654 -0.000006  
H14 3.712780 -0.736656 -0.000007  
H15 1.915294 -2.536990 0.000002

**Cartesian coordinates for the structures in  
Fig. S2, optimized at  $\omega$ B97XD/6-31+G(d,p).**

**9MG<sup>+</sup>\_keto**

|     |           |           |           |
|-----|-----------|-----------|-----------|
| C1  | -1.205070 | 1.373596  | 0.001909  |
| C2  | 0.216428  | 1.034962  | -0.000522 |
| H3  | -2.998666 | 0.360694  | 0.003252  |
| C4  | -1.529625 | -1.090377 | -0.000782 |
| C5  | 2.319045  | 0.954060  | -0.004547 |
| N6  | -1.999354 | 0.182769  | 0.001621  |
| N7  | 1.291141  | 1.814595  | -0.002535 |
| N8  | 1.951099  | -0.354609 | -0.005088 |
| N9  | -0.209725 | -1.400171 | -0.001351 |
| C10 | 0.580661  | -0.354448 | -0.001494 |
| N11 | -2.379566 | -2.107281 | -0.002544 |
| H12 | -1.998213 | -3.043648 | -0.003980 |
| H13 | -3.382593 | -1.994381 | -0.003027 |
| O14 | -1.725507 | 2.455145  | 0.004289  |
| H15 | 3.359046  | 1.254418  | -0.006786 |
| C16 | 2.813108  | -1.534800 | 0.008352  |
| H17 | 2.706734  | -2.055129 | 0.960908  |
| H18 | 2.530419  | -2.196847 | -0.810291 |
| H19 | 3.844872  | -1.211340 | -0.122617 |

**9MG<sup>+</sup>\_enol\_1**

|     |           |           |           |
|-----|-----------|-----------|-----------|
| C1  | 1.290091  | -1.138892 | 0.001683  |
| C2  | -0.142735 | -0.985426 | -0.000358 |
| C3  | 1.472004  | 1.153543  | -0.000681 |
| C4  | -2.245828 | -1.057256 | -0.004806 |
| N5  | 2.054303  | -0.074437 | 0.001540  |
| N6  | -1.157711 | -1.845334 | -0.002895 |
| N7  | -1.978449 | 0.269523  | -0.004670 |
| N8  | 0.129785  | 1.447107  | -0.000954 |
| C9  | -0.604133 | 0.371507  | -0.000922 |
| N10 | 2.285987  | 2.195561  | -0.002744 |
| H11 | 1.905537  | 3.132216  | -0.004428 |
| H12 | 3.287090  | 2.053533  | -0.002964 |
| O13 | 1.794559  | -2.340862 | 0.004066  |
| H14 | -3.259871 | -1.436349 | -0.007487 |
| C15 | -2.923021 | 1.384184  | 0.008051  |
| H16 | -2.851209 | 1.913572  | 0.958917  |
| H17 | -2.688950 | 2.062881  | -0.812386 |
| H18 | -3.929059 | 0.986750  | -0.119552 |
| H19 | 2.764317  | -2.298605 | 0.005628  |

**9MG<sup>+</sup>\_enol\_2**

|    |           |           |           |
|----|-----------|-----------|-----------|
| C1 | -1.286131 | 1.151105  | 0.001647  |
| C2 | 0.141953  | 0.958193  | -0.000279 |
| C3 | -1.503742 | -1.130845 | -0.000555 |
| C4 | 2.245819  | 1.019447  | -0.004804 |
| N5 | -2.067129 | 0.103610  | 0.001578  |
| N6 | 1.162422  | 1.814103  | -0.002778 |
| N7 | 1.966003  | -0.304143 | -0.004727 |
| N8 | -0.163915 | -1.459007 | -0.000960 |
| C9 | 0.588945  | -0.397455 | -0.000930 |

|     |           |           |           |
|-----|-----------|-----------|-----------|
| N10 | -2.337763 | -2.156106 | -0.002427 |
| H11 | -1.979653 | -3.101716 | -0.004042 |
| H12 | -3.335572 | -1.987151 | -0.002491 |
| O13 | -1.829975 | 2.339978  | 0.003902  |
| H14 | 3.262971  | 1.389735  | -0.007502 |
| C15 | 2.902410  | -1.426380 | 0.007897  |
| H16 | 2.825324  | -1.955190 | 0.958632  |
| H17 | 2.662493  | -2.102625 | -0.812850 |
| H18 | 3.911795  | -1.037446 | -0.119312 |
| H19 | -1.160413 | 3.040990  | 0.003691  |

**Cartesian coordinates for the structures in Fig. S3, optimized at  $\omega$ B97XD/6-31+G(d,p).**

*anti-dGuo<sup>+</sup>\_keto*

|     |           |           |           |
|-----|-----------|-----------|-----------|
| O1  | 3.140448  | -1.988426 | 0.263691  |
| C2  | 3.792203  | -1.268264 | -0.779029 |
| H3  | 3.565923  | -1.712828 | -1.754991 |
| H4  | 4.879527  | -1.272390 | -0.633525 |
| C5  | 3.313546  | 0.171276  | -0.771517 |
| H6  | 3.861401  | 0.727109  | -1.537403 |
| O7  | 1.916106  | 0.228549  | -1.108670 |
| C8  | 1.157033  | 0.709596  | -0.039624 |
| H9  | 0.741628  | 1.696114  | -0.266117 |
| N10 | -0.008668 | -0.182237 | 0.102732  |
| C11 | 0.036825  | -1.540927 | 0.198333  |
| H12 | 0.991096  | -2.058686 | 0.233253  |
| N13 | -1.172865 | -2.121615 | 0.220904  |
| C14 | -2.024340 | -1.107168 | 0.119355  |
| C15 | -3.483676 | -1.094136 | 0.081465  |
| O16 | -4.251920 | -2.015476 | 0.150819  |
| N17 | -3.966405 | 0.243899  | -0.063457 |
| H18 | -4.978053 | 0.310048  | -0.103108 |
| C19 | -3.200679 | 1.362457  | -0.148610 |
| N20 | -3.783266 | 2.546383  | -0.292686 |
| H21 | -4.782583 | 2.670308  | -0.353659 |
| H22 | -3.188400 | 3.360622  | -0.358663 |
| N23 | -1.850649 | 1.350316  | -0.092301 |
| C24 | -1.331123 | 0.151151  | 0.030131  |
| C25 | 3.446887  | 0.899850  | 0.572656  |
| H26 | 4.235349  | 0.458602  | 1.191450  |
| C27 | 2.061183  | 0.714596  | 1.195547  |
| H28 | 2.013497  | -0.249782 | 1.707256  |
| H29 | 1.802167  | 1.509435  | 1.897171  |
| O30 | 3.716715  | 2.255894  | 0.276660  |
| H31 | 3.557908  | -2.848164 | 0.366957  |
| H32 | 3.995565  | 2.717480  | 1.072780  |

*anti-dGuo<sup>+</sup>\_enol\_1*

|     |           |           |           |
|-----|-----------|-----------|-----------|
| O1  | 3.109991  | -2.009524 | 0.283760  |
| C2  | 3.785224  | -1.309067 | -0.757858 |
| H3  | 3.560363  | -1.757450 | -1.732414 |
| H4  | 4.870773  | -1.332264 | -0.601555 |
| C5  | 3.331925  | 0.138706  | -0.766623 |
| H6  | 3.893632  | 0.677718  | -1.534543 |
| O7  | 1.937954  | 0.215915  | -1.112172 |
| C8  | 1.180469  | 0.716976  | -0.050703 |
| H9  | 0.781746  | 1.708087  | -0.287380 |
| N10 | -0.000666 | -0.153243 | 0.093239  |
| C11 | 0.014068  | -1.505903 | 0.187692  |
| H12 | 0.956279  | -2.045633 | 0.223073  |
| N13 | -1.208604 | -2.067395 | 0.211513  |
| C14 | -2.038436 | -1.032098 | 0.110650  |
| C15 | -3.472005 | -0.910965 | 0.066933  |
| O16 | -4.200496 | -1.991038 | 0.152938  |
| N17 | -4.020896 | 0.271975  | -0.060874 |

|     |           |           |           |
|-----|-----------|-----------|-----------|
| C18 | -3.213423 | 1.362997  | -0.145048 |
| N19 | -3.814897 | 2.533473  | -0.288488 |
| H20 | -4.823293 | 2.579732  | -0.333911 |
| H21 | -3.262419 | 3.376461  | -0.360700 |
| N22 | -1.844351 | 1.399171  | -0.097157 |
| C23 | -1.323933 | 0.210533  | 0.022141  |
| C24 | 3.470066  | 0.877718  | 0.571238  |
| H25 | 4.249191  | 0.430827  | 1.197996  |
| C26 | 2.078973  | 0.717941  | 1.188749  |
| H27 | 2.014689  | -0.242590 | 1.705978  |
| H28 | 1.827835  | 1.521131  | 1.883751  |
| O29 | 3.761819  | 2.226334  | 0.263178  |
| H30 | 3.515795  | -2.872794 | 0.402350  |
| H31 | 4.031536  | 2.694862  | 1.058399  |
| H32 | -5.141938 | -1.760486 | 0.106678  |

*anti-dGuo<sup>+</sup>\_enol\_2*

|     |           |           |           |
|-----|-----------|-----------|-----------|
| O1  | 3.094244  | -2.009323 | 0.301565  |
| C2  | 3.784321  | -1.316470 | -0.736062 |
| H3  | 3.570189  | -1.770761 | -1.710286 |
| H4  | 4.867720  | -1.341790 | -0.566590 |
| C5  | 3.335062  | 0.132290  | -0.759760 |
| H6  | 3.902898  | 0.663345  | -1.528698 |
| O7  | 1.943283  | 0.208974  | -1.115370 |
| C8  | 1.180591  | 0.724402  | -0.065034 |
| H9  | 0.786819  | 1.714404  | -0.314573 |
| N10 | -0.005515 | -0.140612 | 0.078534  |
| C11 | 0.005957  | -1.492661 | 0.172274  |
| H12 | 0.946693  | -2.035402 | 0.206457  |
| N13 | -1.220372 | -2.046463 | 0.198873  |
| C14 | -2.043469 | -1.003555 | 0.102159  |
| C15 | -3.478852 | -0.906017 | 0.065732  |
| O16 | -4.249042 | -1.961769 | 0.145919  |
| N17 | -4.035508 | 0.269707  | -0.054450 |
| C18 | -3.232443 | 1.361771  | -0.138237 |
| N19 | -3.843484 | 2.527396  | -0.273670 |
| H20 | -4.853604 | 2.559043  | -0.311954 |
| H21 | -3.301364 | 3.377263  | -0.346068 |
| N22 | -1.857913 | 1.416498  | -0.099178 |
| C23 | -1.329039 | 0.231896  | 0.014031  |
| C24 | 3.465684  | 0.883725  | 0.571980  |
| H25 | 4.238886  | 0.440828  | 1.208887  |
| C26 | 2.069727  | 0.733763  | 1.181003  |
| H27 | 1.998488  | -0.222296 | 1.705532  |
| H28 | 1.816078  | 1.543613  | 1.867280  |
| O29 | 3.763148  | 2.228120  | 0.252709  |
| H30 | 3.506162  | -2.866665 | 0.440313  |
| H31 | 4.029338  | 2.704255  | 1.044621  |
| H32 | -3.727054 | -2.774410 | 0.227207  |

*syn-dGuo<sup>+</sup>\_keto*

|    |           |           |           |
|----|-----------|-----------|-----------|
| C1 | -3.509340 | -0.295440 | 0.004018  |
| C2 | -2.285499 | -1.092896 | 0.082435  |
| H3 | -4.015466 | 1.690568  | -0.220223 |
| C4 | -1.952093 | 1.623966  | -0.235810 |
| C5 | -0.786525 | -2.558309 | 0.260214  |



|     |           |           |           |
|-----|-----------|-----------|-----------|
| N6  | -3.197275 | 1.092390  | -0.164921 |
| N7  | -2.116940 | -2.399944 | 0.247708  |
| N8  | -0.083068 | -1.405311 | 0.094027  |
| N9  | -0.826918 | 0.872120  | -0.167494 |
| C10 | -1.024905 | -0.413863 | -0.014699 |
| N11 | -1.778854 | 2.928902  | -0.377437 |
| H12 | -0.829365 | 3.285184  | -0.414006 |
| H13 | -2.542839 | 3.586386  | -0.433884 |
| O14 | -4.650885 | -0.660612 | 0.061809  |
| H15 | -0.292601 | -3.512727 | 0.390545  |
| C16 | 1.382736  | -1.264755 | 0.093042  |
| O17 | 1.717621  | -0.365045 | 1.109367  |
| C18 | 1.967949  | -0.692414 | -1.195582 |
| H19 | 1.770761  | -2.269736 | 0.299058  |
| C20 | 2.921657  | 0.355238  | 0.750938  |
| C21 | 3.283450  | -0.121387 | -0.675825 |
| H22 | 1.335338  | 0.108753  | -1.584127 |
| H23 | 3.708837  | 0.056597  | 1.451810  |
| H24 | 3.644935  | 0.704569  | -1.296909 |
| O25 | 4.199303  | -1.198247 | -0.650150 |
| H26 | 5.087260  | -0.881712 | -0.459379 |
| C27 | 2.650515  | 1.845466  | 0.900085  |
| H28 | 2.378521  | 2.052798  | 1.943163  |
| H29 | 3.563386  | 2.402980  | 0.672494  |
| O30 | 1.648039  | 2.295956  | 0.010687  |
| H31 | 0.881106  | 1.716998  | 0.126546  |
| H32 | 2.131231  | -1.447814 | -1.964865 |

*syn-dGuo<sup>+</sup>\_enol\_1*

|     |           |           |           |
|-----|-----------|-----------|-----------|
| C1  | -3.419101 | -0.177271 | -0.007355 |
| C2  | -2.266220 | -1.039765 | 0.077126  |
| C3  | -1.996409 | 1.612321  | -0.231672 |
| C4  | -0.784516 | -2.522376 | 0.251476  |
| N5  | -3.257397 | 1.114362  | -0.160268 |
| N6  | -2.116213 | -2.351875 | 0.238904  |
| N7  | -0.067883 | -1.383812 | 0.090122  |
| N8  | -0.820397 | 0.907511  | -0.164731 |
| C9  | -1.000640 | -0.373903 | -0.017182 |
| N10 | -1.866983 | 2.919182  | -0.379477 |
| H11 | -0.944715 | 3.336073  | -0.433483 |
| H12 | -2.690625 | 3.503320  | -0.433114 |
| O13 | -4.605817 | -0.710326 | 0.071033  |
| H14 | -0.303655 | -3.483835 | 0.379654  |
| C15 | 1.398876  | -1.261116 | 0.091983  |
| O16 | 1.740466  | -0.371931 | 1.113896  |
| C17 | 1.990366  | -0.687572 | -1.193188 |
| H18 | 1.775109  | -2.271879 | 0.292258  |
| C19 | 2.942373  | 0.351911  | 0.755780  |
| C20 | 3.308198  | -0.127705 | -0.667983 |
| H21 | 1.364617  | 0.120269  | -1.579023 |
| H22 | 3.727580  | 0.057812  | 1.460868  |
| H23 | 3.679056  | 0.695252  | -1.287352 |
| O24 | 4.215091  | -1.212638 | -0.638311 |
| H25 | 5.103425  | -0.903352 | -0.437777 |
| C26 | 2.669975  | 1.842528  | 0.895448  |
| H27 | 2.369179  | 2.050628  | 1.930611  |

|     |           |           |           |
|-----|-----------|-----------|-----------|
| H28 | 3.592777  | 2.394799  | 0.696276  |
| O29 | 1.701245  | 2.302137  | -0.023966 |
| H30 | 0.902880  | 1.767978  | 0.095770  |
| H31 | 2.149658  | -1.441134 | -1.965147 |
| H32 | -5.288478 | -0.023744 | 0.000795  |

*syn-dGuo<sup>+</sup>\_enol\_2*

|     |           |           |           |
|-----|-----------|-----------|-----------|
| C1  | -3.427174 | -0.150251 | -0.008397 |
| C2  | -2.265447 | -1.000724 | 0.072653  |
| C3  | -2.006198 | 1.631160  | -0.231086 |
| C4  | -0.803118 | -2.502975 | 0.245793  |
| N5  | -3.266814 | 1.137904  | -0.159992 |
| N6  | -2.132735 | -2.316500 | 0.231764  |
| N7  | -0.077120 | -1.370777 | 0.088230  |
| N8  | -0.819775 | 0.933161  | -0.163448 |
| C9  | -0.999137 | -0.348064 | -0.018279 |
| N10 | -1.880678 | 2.937736  | -0.380992 |
| H11 | -0.961484 | 3.360726  | -0.438132 |
| H12 | -2.710765 | 3.514094  | -0.435670 |
| O13 | -4.641937 | -0.627036 | 0.064110  |
| H14 | -0.331294 | -3.469010 | 0.371969  |
| C15 | 1.391756  | -1.263064 | 0.090626  |
| O16 | 1.740150  | -0.380099 | 1.114565  |
| C17 | 1.987178  | -0.691145 | -1.193248 |
| H18 | 1.757789  | -2.278214 | 0.287983  |
| C19 | 2.947911  | 0.335867  | 0.757565  |
| C20 | 3.310265  | -0.145414 | -0.666319 |
| H21 | 1.369126  | 0.124523  | -1.575158 |
| H22 | 3.730049  | 0.034981  | 1.463100  |
| H23 | 3.689752  | 0.674513  | -1.284358 |
| O24 | 4.205621  | -1.239904 | -0.637259 |
| H25 | 5.097610  | -0.940064 | -0.438581 |
| C26 | 2.686742  | 1.828343  | 0.897430  |
| H27 | 2.382743  | 2.038199  | 1.931280  |
| H28 | 3.615351  | 2.372701  | 0.703630  |
| O29 | 1.727714  | 2.297424  | -0.026891 |
| H30 | 0.916684  | 1.784819  | 0.099676  |
| H31 | 2.138984  | -1.443415 | -1.967971 |
| H32 | -4.643747 | -1.590000 | 0.176661  |

**Cartesian coordinates for the structures in  
Fig. S4, optimized at  $\omega$ B97XD/6-31+G(d,p).**

*anti-Guo<sup>++</sup>\_keto*

|     |           |           |           |
|-----|-----------|-----------|-----------|
| O1  | 3.035367  | -2.087249 | 0.455746  |
| C2  | 3.771234  | -1.527828 | -0.625177 |
| H3  | 3.625974  | -2.114054 | -1.540080 |
| H4  | 4.844101  | -1.493551 | -0.396376 |
| C5  | 3.280964  | -0.112421 | -0.870549 |
| H6  | 3.862178  | 0.319883  | -1.691202 |
| O7  | 1.902681  | -0.147250 | -1.290259 |
| C8  | 1.083186  | 0.503531  | -0.370392 |
| H9  | 0.707929  | 1.459488  | -0.751534 |
| N10 | -0.099329 | -0.336755 | -0.150275 |
| C11 | -0.093406 | -1.675056 | 0.102790  |
| H12 | 0.842703  | -2.221480 | 0.155946  |
| N13 | -1.317723 | -2.197586 | 0.271120  |
| C14 | -2.138089 | -1.163295 | 0.122412  |
| C15 | -3.594007 | -1.089201 | 0.198700  |
| O16 | -4.386935 | -1.964838 | 0.419441  |
| N17 | -4.037573 | 0.249447  | -0.034484 |
| H18 | -5.045156 | 0.358632  | 0.011727  |
| C19 | -3.241839 | 1.317879  | -0.299125 |
| N20 | -3.789975 | 2.508997  | -0.504901 |
| H21 | -4.784420 | 2.675994  | -0.476892 |
| H22 | -3.171514 | 3.286358  | -0.690657 |
| N23 | -1.894354 | 1.247793  | -0.366988 |
| C24 | -1.410575 | 0.047497  | -0.153053 |
| C25 | 3.325483  | 0.818746  | 0.351503  |
| H26 | 4.083438  | 0.516342  | 1.080141  |
| C27 | 1.906940  | 0.703549  | 0.921930  |
| H28 | 1.841415  | -0.200383 | 1.533251  |
| O29 | 3.471896  | 2.176602  | -0.022246 |
| H30 | 3.439289  | -2.916119 | 0.728029  |
| H31 | 4.399013  | 2.422626  | -0.076735 |
| O32 | 1.483740  | 1.784078  | 1.685992  |
| H33 | 1.934363  | 2.571840  | 1.349442  |

*anti-Guo<sup>++</sup>\_enol\_1*

|     |           |           |           |
|-----|-----------|-----------|-----------|
| O1  | 3.004472  | -2.113448 | 0.461795  |
| C2  | 3.757141  | -1.567178 | -0.614457 |
| H3  | 3.607958  | -2.151852 | -1.529752 |
| H4  | 4.828905  | -1.551524 | -0.378421 |
| C5  | 3.293195  | -0.143827 | -0.865457 |
| H6  | 3.885746  | 0.275259  | -1.684917 |
| O7  | 1.916555  | -0.156013 | -1.290522 |
| C8  | 1.103990  | 0.510840  | -0.375437 |
| H9  | 0.745563  | 1.471581  | -0.760991 |
| N10 | -0.093466 | -0.307350 | -0.156796 |
| C11 | -0.118096 | -1.638396 | 0.098015  |
| H12 | 0.805087  | -2.206386 | 0.153520  |
| N13 | -1.354549 | -2.140869 | 0.266170  |
| C14 | -2.152547 | -1.086861 | 0.112294  |
| C15 | -3.579552 | -0.908391 | 0.165103  |
| O16 | -4.336953 | -1.941734 | 0.417791  |

|     |           |           |           |
|-----|-----------|-----------|-----------|
| N17 | -4.094409 | 0.279096  | -0.038574 |
| C18 | -3.257423 | 1.319058  | -0.298455 |
| N19 | -3.824885 | 2.497897  | -0.499814 |
| H20 | -4.830265 | 2.587817  | -0.454350 |
| H21 | -3.248424 | 3.305397  | -0.691408 |
| N22 | -1.889619 | 1.296739  | -0.375949 |
| C23 | -1.404325 | 0.106988  | -0.163775 |
| C24 | 3.349318  | 0.790704  | 0.353446  |
| H25 | 4.099742  | 0.478498  | 1.085821  |
| C26 | 1.927165  | 0.701209  | 0.919231  |
| H27 | 1.843887  | -0.199869 | 1.532401  |
| O28 | 3.519582  | 2.144362  | -0.024889 |
| H29 | 3.395286  | -2.946745 | 0.739407  |
| H30 | 4.450733  | 2.375016  | -0.076984 |
| O31 | 1.520428  | 1.789694  | 1.680273  |
| H32 | 1.978164  | 2.571081  | 1.338638  |
| H33 | -5.269756 | -1.674634 | 0.423141  |

*anti-Guo<sup>++</sup>\_enol\_2*

|     |           |           |           |
|-----|-----------|-----------|-----------|
| O1  | 2.987810  | -2.116500 | 0.464928  |
| C2  | 3.750914  | -1.572196 | -0.605553 |
| H3  | 3.607692  | -2.157481 | -1.521364 |
| H4  | 4.820648  | -1.559475 | -0.360748 |
| C5  | 3.292926  | -0.147836 | -0.861483 |
| H6  | 3.889298  | 0.266991  | -1.680294 |
| O7  | 1.917272  | -0.157413 | -1.290854 |
| C8  | 1.104768  | 0.516845  | -0.381697 |
| H9  | 0.751673  | 1.477733  | -0.771886 |
| N10 | -0.097963 | -0.295384 | -0.164781 |
| C11 | -0.127054 | -1.626160 | 0.087719  |
| H12 | 0.793818  | -2.198211 | 0.141568  |
| N13 | -1.367080 | -2.119942 | 0.256175  |
| C14 | -2.156987 | -1.057682 | 0.104503  |
| C15 | -3.586177 | -0.901642 | 0.164091  |
| O16 | -4.385045 | -1.909554 | 0.410672  |
| N17 | -4.107992 | 0.279469  | -0.033461 |
| C18 | -3.274452 | 1.320436  | -0.291062 |
| N19 | -3.850134 | 2.495605  | -0.485644 |
| H20 | -4.857251 | 2.571899  | -0.435128 |
| H21 | -3.282935 | 3.309967  | -0.676696 |
| N22 | -1.901096 | 1.315505  | -0.375525 |
| C23 | -1.408150 | 0.128740  | -0.168882 |
| C24 | 3.347922  | 0.790446  | 0.354730  |
| H25 | 4.094904  | 0.478134  | 1.090596  |
| C26 | 1.923537  | 0.707322  | 0.915853  |
| H27 | 1.834843  | -0.192608 | 1.530039  |
| O28 | 3.523134  | 2.142093  | -0.027261 |
| H29 | 3.383066  | -2.943385 | 0.755082  |
| H30 | 4.454947  | 2.370679  | -0.077273 |
| O31 | 1.517469  | 1.797895  | 1.673489  |
| H32 | 1.977417  | 2.578072  | 1.331975  |
| H33 | -3.886877 | -2.730893 | 0.539675  |

*syn-Guo<sup>++</sup>\_keto*

|    |          |           |           |
|----|----------|-----------|-----------|
| C1 | 3.610210 | -0.387724 | 0.034109  |
| C2 | 2.354674 | -1.096453 | -0.211365 |

|     |           |           |           |
|-----|-----------|-----------|-----------|
| H3  | 4.204381  | 1.534344  | 0.484411  |
| C4  | 2.147298  | 1.597717  | 0.325189  |
| C5  | 0.794906  | -2.452024 | -0.608168 |
| N6  | 3.362644  | 0.997874  | 0.300218  |
| N7  | 2.126687  | -2.376345 | -0.481000 |
| N8  | 0.148819  | -1.267653 | -0.430411 |
| N9  | 0.992265  | 0.932015  | 0.083307  |
| C10 | 1.131208  | -0.347502 | -0.164813 |
| N11 | 2.037475  | 2.890442  | 0.591589  |
| H12 | 1.110178  | 3.301256  | 0.605581  |
| H13 | 2.829741  | 3.483796  | 0.789770  |
| O14 | 4.730292  | -0.818090 | 0.036591  |
| H15 | 0.258410  | -3.365577 | -0.829097 |
| C16 | -1.301155 | -1.052494 | -0.453868 |
| O17 | -1.577146 | 0.000223  | -1.321272 |
| C18 | -1.881408 | -0.649410 | 0.914953  |
| H19 | -1.737951 | -2.003193 | -0.787330 |
| C20 | -2.774666 | 0.695341  | -0.881929 |
| C21 | -3.166079 | 0.063612  | 0.469170  |
| H22 | -1.216070 | 0.075996  | 1.392031  |
| H23 | -3.562655 | 0.506263  | -1.618347 |
| H24 | -3.486842 | 0.814024  | 1.196949  |
| O25 | -2.054848 | -1.725078 | 1.774321  |
| H26 | -2.938417 | -2.087966 | 1.613763  |
| O27 | -4.128908 | -0.964418 | 0.319664  |
| H28 | -5.021776 | -0.617126 | 0.393270  |
| C29 | -2.451027 | 2.181595  | -0.836904 |
| H30 | -2.168043 | 2.511723  | -1.844606 |
| H31 | -3.340857 | 2.740817  | -0.534999 |
| O32 | -1.432938 | 2.465258  | 0.101102  |
| H33 | -0.680710 | 1.892195  | -0.108810 |

*syn-Guo<sup>+</sup>\_enol\_1*

|     |           |           |           |
|-----|-----------|-----------|-----------|
| C1  | 3.526668  | -0.262125 | 0.050233  |
| C2  | 2.339596  | -1.039996 | -0.204607 |
| C3  | 2.191414  | 1.588057  | 0.317207  |
| C4  | 0.796823  | -2.414092 | -0.601838 |
| N5  | 3.423923  | 1.019915  | 0.303435  |
| N6  | 2.130217  | -2.326500 | -0.469101 |
| N7  | 0.136991  | -1.242577 | -0.435173 |
| N8  | 0.989004  | 0.970476  | 0.077638  |
| C9  | 1.110759  | -0.303360 | -0.166657 |
| N10 | 2.123154  | 2.879925  | 0.588902  |
| H11 | 1.224717  | 3.347307  | 0.619640  |
| H12 | 2.970244  | 3.398627  | 0.778050  |
| O13 | 4.684399  | -0.859837 | 0.023941  |
| H14 | 0.273498  | -3.335931 | -0.820219 |
| C15 | -1.314677 | -1.045531 | -0.462939 |
| O16 | -1.598542 | 0.007655  | -1.325262 |
| C17 | -1.901822 | -0.657605 | 0.907423  |
| H18 | -1.739417 | -1.999821 | -0.802269 |
| C19 | -2.795297 | 0.698787  | -0.878433 |
| C20 | -3.189332 | 0.050619  | 0.463390  |
| H21 | -1.242989 | 0.067931  | 1.393022  |
| H22 | -3.581338 | 0.520430  | -1.619705 |
| H23 | -3.517893 | 0.791843  | 1.197012  |

|     |           |           |           |
|-----|-----------|-----------|-----------|
| O24 | -2.071142 | -1.743056 | 1.755932  |
| H25 | -2.952819 | -2.108043 | 1.589869  |
| O26 | -4.144741 | -0.982778 | 0.299987  |
| H27 | -5.039916 | -0.640705 | 0.369438  |
| C28 | -2.472845 | 2.183964  | -0.808847 |
| H29 | -2.164268 | 2.524607  | -1.805659 |
| H30 | -3.372521 | 2.738007  | -0.526569 |
| O31 | -1.485183 | 2.463362  | 0.160461  |
| H32 | -0.700776 | 1.937430  | -0.055761 |
| H33 | 5.394401  | -0.225432 | 0.213179  |

*syn-Guo<sup>+</sup>\_enol\_2*

|     |           |           |           |
|-----|-----------|-----------|-----------|
| C1  | 3.535040  | -0.239415 | 0.058547  |
| C2  | 2.338789  | -1.002696 | -0.196437 |
| C3  | 2.204821  | 1.606934  | 0.311578  |
| C4  | 0.812246  | -2.394900 | -0.594706 |
| N5  | 3.435869  | 1.040403  | 0.304777  |
| N6  | 2.144106  | -2.294106 | -0.455170 |
| N7  | 0.145149  | -1.227105 | -0.437600 |
| N8  | 0.991797  | 0.998423  | 0.070918  |
| C9  | 1.110261  | -0.276028 | -0.168430 |
| N10 | 2.142502  | 2.899365  | 0.579795  |
| H11 | 1.248264  | 3.374653  | 0.609301  |
| H12 | 2.996229  | 3.408748  | 0.769049  |
| O13 | 4.721657  | -0.787193 | 0.054014  |
| H14 | 0.296233  | -3.321310 | -0.810376 |
| C15 | -1.308995 | -1.042849 | -0.469709 |
| O16 | -1.597820 | 0.013654  | -1.324594 |
| C17 | -1.902038 | -0.670672 | 0.902318  |
| H18 | -1.724147 | -1.998558 | -0.817147 |
| C19 | -2.800603 | 0.693591  | -0.874939 |
| C20 | -3.193456 | 0.031827  | 0.460645  |
| H21 | -1.250023 | 0.055822  | 1.395816  |
| H22 | -3.583217 | 0.515808  | -1.619886 |
| H23 | -3.528472 | 0.765294  | 1.199107  |
| O24 | -2.064999 | -1.765522 | 1.740014  |
| H25 | -2.945840 | -2.131960 | 1.572274  |
| O26 | -4.141148 | -1.006929 | 0.287278  |
| H27 | -5.038898 | -0.671848 | 0.358071  |
| C28 | -2.488159 | 2.180018  | -0.791213 |
| H29 | -2.176593 | 2.531460  | -1.783322 |
| H30 | -3.393315 | 2.725340  | -0.509523 |
| O31 | -1.508751 | 2.457997  | 0.186397  |
| H32 | -0.712641 | 1.953881  | -0.038088 |
| H33 | 4.677507  | -1.737113 | -0.135106 |

**Cartesian coordinates for the structures in  
Fig. 2, optimized at  $\omega$ B97XD/6-31+G(d,p).**

**9HG<sup>+</sup>·W12a**

|     |           |           |           |
|-----|-----------|-----------|-----------|
| C1  | 0.057752  | 1.313670  | -0.000019 |
| C2  | -1.237153 | 0.631594  | -0.000001 |
| H3  | 2.068657  | 0.753590  | -0.000028 |
| C4  | 0.980995  | -0.979828 | -0.000019 |
| C5  | -3.264413 | 0.050824  | 0.000025  |
| N6  | 1.118356  | 0.369389  | -0.000026 |
| N7  | -2.474995 | 1.126176  | 0.000017  |
| N8  | -2.576978 | -1.126191 | 0.000012  |
| N9  | -0.221931 | -1.619087 | -0.000012 |
| C10 | -1.244915 | -0.804097 | -0.000003 |
| N11 | 2.066269  | -1.733328 | -0.000017 |
| H12 | 1.952194  | -2.737146 | -0.000014 |
| H13 | 2.993554  | -1.313124 | -0.000012 |
| O14 | 0.276107  | 2.496426  | -0.000027 |
| H15 | -4.345392 | 0.088486  | 0.000041  |
| H16 | -2.966333 | -2.059847 | 0.000017  |
| O17 | 3.995365  | 0.432387  | 0.000042  |
| H18 | 4.498500  | 0.722928  | -0.769063 |
| H19 | 4.498405  | 0.722925  | 0.769211  |

**9HG<sup>+</sup>·W16**

|     |           |           |           |
|-----|-----------|-----------|-----------|
| C1  | -0.429751 | -1.044077 | -0.000001 |
| C2  | 0.996756  | -0.723291 | -0.000001 |
| H3  | -2.237034 | -0.053917 | -0.000014 |
| C4  | -0.737314 | 1.396791  | -0.000001 |
| C5  | 3.104682  | -0.679664 | 0.000000  |
| N6  | -1.217011 | 0.135122  | -0.000007 |
| N7  | 2.066610  | -1.518154 | 0.000000  |
| N8  | 2.741407  | 0.633767  | 0.000000  |
| N9  | 0.588791  | 1.709892  | 0.000000  |
| C10 | 1.371220  | 0.662598  | -0.000001 |
| N11 | -1.581984 | 2.417484  | 0.000004  |
| H12 | -1.202138 | 3.354074  | 0.000008  |
| H13 | -2.584000 | 2.294865  | 0.000014  |
| O14 | -0.945371 | -2.134143 | 0.000003  |
| H15 | 4.140416  | -0.991647 | 0.000001  |
| H16 | 3.356929  | 1.436604  | 0.000001  |
| O17 | -3.720634 | -0.940987 | 0.000014  |
| H18 | -4.680018 | -0.883441 | -0.000121 |
| H19 | -3.484362 | -1.876415 | 0.000030  |

**9HG<sup>+</sup>·W9**

|    |           |           |           |
|----|-----------|-----------|-----------|
| C1 | 1.758152  | 1.026519  | -0.000063 |
| C2 | 0.299892  | 1.109502  | 0.000007  |
| H3 | 3.186232  | -0.456524 | -0.000093 |
| C4 | 1.361106  | -1.424294 | 0.000022  |
| C5 | -1.735703 | 1.642830  | 0.000105  |
| N6 | 2.178095  | -0.340076 | -0.000048 |
| N7 | -0.502156 | 2.169087  | 0.000027  |
| N8 | -1.757837 | 0.286590  | 0.000133  |
| N9 | 0.009883  | -1.344890 | 0.000085  |

|     |           |           |           |
|-----|-----------|-----------|-----------|
| C10 | -0.452898 | -0.117291 | 0.000076  |
| N11 | 1.885966  | -2.642418 | 0.000030  |
| H12 | 1.251737  | -3.429496 | 0.000082  |
| H13 | 2.879150  | -2.820677 | -0.000012 |
| O14 | 2.567034  | 1.914336  | -0.000126 |
| H15 | -2.643807 | 2.230407  | 0.000158  |
| H16 | -2.608894 | -0.305042 | 0.000203  |
| O17 | -4.170820 | -1.024991 | -0.000174 |
| H18 | -4.657496 | -1.327543 | -0.772887 |
| H19 | -4.657579 | -1.327536 | 0.772487  |

**9HG<sup>+</sup>·W2b**

|     |           |           |           |
|-----|-----------|-----------|-----------|
| C1  | -1.229264 | 1.477760  | -0.000001 |
| C2  | -1.587083 | 0.060757  | 0.000003  |
| H3  | 0.492591  | 2.599253  | -0.000003 |
| C4  | 1.109807  | 0.627609  | -0.000003 |
| C5  | -2.509855 | -1.834777 | 0.000002  |
| N6  | 0.188526  | 1.631177  | -0.000005 |
| N7  | -2.782674 | -0.529075 | 0.000006  |
| N8  | -1.175364 | -2.109259 | -0.000005 |
| N9  | 0.765796  | -0.691199 | -0.000009 |
| C10 | -0.524049 | -0.902532 | -0.000003 |
| N11 | 2.395230  | 0.909935  | 0.000010  |
| H12 | 3.097614  | 0.151613  | 0.000032  |
| H13 | 2.731501  | 1.862380  | 0.000019  |
| O14 | -1.953123 | 2.436358  | -0.000001 |
| H15 | -3.259960 | -2.613803 | 0.000004  |
| H16 | -0.740631 | -3.022526 | -0.000010 |
| O17 | 4.510753  | -0.881015 | 0.000000  |
| H18 | 4.959908  | -1.236879 | 0.772326  |
| H19 | 4.960009  | -1.236740 | -0.772331 |

**9MG<sup>+</sup>·W12a**

|     |           |           |           |
|-----|-----------|-----------|-----------|
| C1  | 0.610261  | 1.452293  | -0.001944 |
| C2  | -0.791531 | 1.031967  | 0.000496  |
| H3  | 2.474569  | 0.514452  | -0.002625 |
| C4  | 1.075676  | -0.978664 | 0.001088  |
| C5  | -2.886951 | 0.829043  | 0.004646  |
| N6  | 1.468848  | 0.319876  | -0.001498 |
| N7  | -1.912343 | 1.747426  | 0.002493  |
| N8  | -2.443349 | -0.455688 | 0.005471  |
| N9  | -0.225728 | -1.373871 | 0.001615  |
| C10 | -1.074036 | -0.375744 | 0.001682  |
| N11 | 1.999374  | -1.924952 | 0.003088  |
| H12 | 1.696579  | -2.888361 | 0.004708  |
| H13 | 2.989292  | -1.687822 | 0.003142  |
| O14 | 1.056348  | 2.569552  | -0.004402 |
| H15 | -3.942924 | 1.066665  | 0.006917  |
| O16 | 4.311613  | -0.182968 | -0.000489 |
| H17 | 4.861473  | 0.002521  | -0.769997 |
| H18 | 4.860897  | 0.007710  | 0.768152  |
| C19 | -3.233315 | -1.683505 | -0.009088 |
| H20 | -3.100469 | -2.194789 | -0.963341 |
| H21 | -2.909024 | -2.331340 | 0.805606  |
| H22 | -4.282315 | -1.423591 | 0.127096  |

**9MG<sup>+</sup>·W16**

|     |           |           |           |
|-----|-----------|-----------|-----------|
| C1  | -0.949140 | -1.055709 | 0.000495  |
| C2  | 0.511283  | -1.000652 | 0.001798  |
| H3  | -2.542744 | 0.250200  | -0.000806 |
| C4  | -0.804193 | 1.402111  | 0.002575  |
| C5  | 2.591438  | -1.322374 | 0.003853  |
| N6  | -1.506317 | 0.248625  | 0.000906  |
| N7  | 1.419410  | -1.971408 | 0.003277  |
| N8  | 2.479804  | 0.031987  | 0.004094  |
| N9  | 0.554898  | 1.468099  | 0.001789  |
| C10 | 1.133006  | 0.293229  | 0.001701  |
| N11 | -1.452048 | 2.559238  | 0.004969  |
| H12 | -0.910455 | 3.412029  | 0.005780  |
| H13 | -2.459593 | 2.618302  | 0.006785  |
| O14 | -1.658638 | -2.031239 | -0.001209 |
| H15 | 3.555250  | -1.814805 | 0.005308  |
| O16 | -4.162578 | -0.368024 | -0.005709 |
| H17 | -5.099746 | -0.155294 | -0.010914 |
| H18 | -4.080126 | -1.329429 | -0.006654 |
| C19 | 3.549578  | 1.025973  | -0.011896 |
| H20 | 3.546272  | 1.554602  | -0.965952 |
| H21 | 3.397419  | 1.733630  | 0.803377  |
| H22 | 4.501395  | 0.513612  | 0.122023  |

**9MG<sup>+</sup>·W2b**

|     |           |           |           |
|-----|-----------|-----------|-----------|
| C1  | -1.077484 | -1.854905 | 0.000279  |
| C2  | -1.529550 | -0.465404 | -0.003325 |
| H3  | 0.716753  | -2.856704 | 0.007930  |
| C4  | 1.200394  | -0.847930 | 0.005764  |
| C5  | -2.557219 | 1.371230  | -0.009346 |
| N6  | 0.348215  | -1.911443 | 0.005701  |
| N7  | -2.756575 | 0.047056  | -0.009544 |
| N8  | -1.249005 | 1.738146  | -0.004629 |
| N9  | 0.769764  | 0.442722  | 0.004753  |
| C10 | -0.533324 | 0.566882  | 0.000331  |
| N11 | 2.502808  | -1.047747 | 0.007161  |
| H12 | 3.153721  | -0.246739 | 0.004053  |
| H13 | 2.898826  | -1.976612 | 0.007761  |
| O14 | -1.732214 | -2.862408 | -0.000374 |
| H15 | -3.354133 | 2.103444  | -0.013751 |
| O16 | 4.500451  | 0.890515  | -0.011966 |
| H17 | 4.951361  | 1.255090  | 0.755199  |
| H18 | 4.957105  | 1.226573  | -0.788716 |
| C19 | -0.688582 | 3.085891  | 0.014637  |
| H20 | -0.193428 | 3.263846  | 0.970065  |
| H21 | 0.030560  | 3.188766  | -0.798235 |
| H22 | -1.498519 | 3.801765  | -0.119719 |

**9MG<sup>+</sup>·W8**

|    |           |           |           |
|----|-----------|-----------|-----------|
| O1 | -4.868918 | 0.146761  | -0.000176 |
| H2 | -5.440253 | 0.261603  | -0.766109 |
| H3 | -5.440468 | 0.261495  | 0.765612  |
| N4 | 2.555205  | 0.334221  | -0.000044 |
| C5 | 2.196721  | -0.975283 | -0.000041 |
| N6 | 0.911352  | -1.397808 | 0.000004  |
| C7 | 0.032098  | -0.423775 | 0.000040  |

|     |           |           |           |
|-----|-----------|-----------|-----------|
| C8  | 0.275333  | 0.992858  | 0.000038  |
| C9  | 1.661705  | 1.451988  | -0.000006 |
| N10 | -0.861579 | 1.676222  | 0.000076  |
| C11 | -1.816480 | 0.729079  | 0.000102  |
| N12 | -1.331278 | -0.540890 | 0.000081  |
| H13 | 3.535115  | 0.597703  | -0.000076 |
| N14 | 3.134647  | -1.913853 | -0.000083 |
| H15 | 2.836883  | -2.879634 | -0.000078 |
| H16 | 4.123245  | -1.712226 | -0.000118 |
| O17 | 2.089995  | 2.574091  | -0.000013 |
| H18 | -2.886991 | 0.914783  | 0.000129  |
| C19 | -2.098428 | -1.785711 | 0.000123  |
| H20 | -1.851206 | -2.362273 | -0.892073 |
| H21 | -1.851461 | -2.362066 | 0.892525  |
| H22 | -3.157598 | -1.526382 | -0.000060 |

**dGuo<sup>+</sup>·W12a**

|     |           |           |           |
|-----|-----------|-----------|-----------|
| O1  | 3.753130  | 1.820432  | -0.202440 |
| C2  | 4.326607  | 1.032182  | 0.836458  |
| H3  | 4.121182  | 1.476590  | 1.817171  |
| H4  | 5.412950  | 0.948650  | 0.707171  |
| C5  | 3.732665  | -0.363041 | 0.794713  |
| H6  | 4.225344  | -0.975854 | 1.554804  |
| O7  | 2.332299  | -0.313683 | 1.114258  |
| C8  | 1.550205  | -0.718143 | 0.028149  |
| H9  | 1.062248  | -1.675586 | 0.233574  |
| N10 | 0.457228  | 0.256858  | -0.114240 |
| C11 | 0.598621  | 1.609545  | -0.200583 |
| H12 | 1.585713  | 2.060923  | -0.221461 |
| N13 | -0.565492 | 2.273113  | -0.232977 |
| C14 | -1.489650 | 1.319914  | -0.148717 |
| C15 | -2.948449 | 1.410239  | -0.127830 |
| O16 | -3.639045 | 2.394265  | -0.198945 |
| N17 | -3.525723 | 0.119392  | -0.000673 |
| H18 | -4.548158 | 0.082265  | 0.033561  |
| C19 | -2.843542 | -1.051477 | 0.084199  |
| N20 | -3.529538 | -2.177343 | 0.209116  |
| H21 | -4.545718 | -2.168712 | 0.247256  |
| H22 | -3.015554 | -3.043596 | 0.276576  |
| N23 | -1.491039 | -1.143612 | 0.046061  |
| C24 | -0.888262 | 0.016268  | -0.059892 |
| C25 | 3.827550  | -1.072837 | -0.562737 |
| H26 | 4.654355  | -0.679225 | -1.163470 |
| C27 | 2.467784  | -0.771933 | -1.195945 |
| H28 | 2.500936  | 0.201778  | -1.690824 |
| H29 | 2.157044  | -1.532137 | -1.914825 |
| O30 | 3.994338  | -2.451018 | -0.291584 |
| H31 | 4.231912  | 2.650819  | -0.273887 |
| H32 | 4.229736  | -2.917970 | -1.098517 |
| O33 | -6.186478 | -0.992795 | 0.204375  |
| H34 | -6.726672 | -0.850101 | 0.989497  |
| H35 | -6.798495 | -0.998616 | -0.539831 |

**dGuo<sup>+</sup>·W16**

|    |          |           |           |
|----|----------|-----------|-----------|
| O1 | 3.569803 | -2.018810 | 0.263184  |
| C2 | 4.228518 | -1.308587 | -0.781721 |

|     |           |           |           |
|-----|-----------|-----------|-----------|
| H3  | 3.994947  | -1.751786 | -1.756636 |
| H4  | 5.316060  | -1.325981 | -0.638038 |
| C5  | 3.767001  | 0.136665  | -0.776068 |
| H6  | 4.321870  | 0.684957  | -1.542484 |
| O7  | 2.371046  | 0.209641  | -1.112493 |
| C8  | 1.617619  | 0.702109  | -0.043201 |
| H9  | 1.218235  | 1.694989  | -0.270750 |
| N10 | 0.439685  | -0.169771 | 0.100731  |
| C11 | 0.460110  | -1.528329 | 0.199320  |
| H12 | 1.404369  | -2.063479 | 0.233104  |
| N13 | -0.758889 | -2.086976 | 0.226742  |
| C14 | -1.593701 | -1.056899 | 0.125364  |
| C15 | -3.052641 | -1.010007 | 0.092869  |
| O16 | -3.831199 | -1.930087 | 0.173289  |
| N17 | -3.516152 | 0.320446  | -0.056971 |
| H18 | -4.548025 | 0.391997  | -0.099495 |
| C19 | -2.732618 | 1.419100  | -0.137518 |
| N20 | -3.302172 | 2.610936  | -0.272926 |
| H21 | -4.302749 | 2.733923  | -0.312246 |
| H22 | -2.703632 | 3.421825  | -0.336664 |
| N23 | -1.377756 | 1.394278  | -0.087653 |
| C24 | -0.878622 | 0.187962  | 0.031952  |
| C25 | 3.910401  | 0.864196  | 0.567593  |
| H26 | 4.694234  | 0.413813  | 1.185849  |
| C27 | 2.523175  | 0.695773  | 1.191024  |
| H28 | 2.464154  | -0.268453 | 1.701895  |
| H29 | 2.273702  | 1.493006  | 1.893508  |
| O30 | 4.197624  | 2.216725  | 0.270374  |
| H31 | 3.973632  | -2.885283 | 0.363533  |
| H32 | 4.469321  | 2.677956  | 1.069151  |
| O33 | -6.208680 | -0.137587 | -0.028189 |
| H34 | -7.112927 | 0.064068  | -0.283343 |
| H35 | -6.140407 | -1.094895 | 0.076161  |

**dGuo<sup>+</sup>·W2b**

|     |           |           |           |
|-----|-----------|-----------|-----------|
| O1  | 3.659378  | -1.774859 | 0.132708  |
| C2  | 4.157154  | -0.892286 | -0.868708 |
| H3  | 3.985736  | -1.307155 | -1.868760 |
| H4  | 5.232939  | -0.721758 | -0.736841 |
| C5  | 3.443808  | 0.442213  | -0.761941 |
| H6  | 3.876262  | 1.130731  | -1.493469 |
| O7  | 2.051732  | 0.283938  | -1.082364 |
| C8  | 1.242311  | 0.566341  | 0.022725  |
| H9  | 0.672719  | 1.486748  | -0.136764 |
| N10 | 0.239576  | -0.505536 | 0.118454  |
| C11 | 0.499756  | -1.842713 | 0.139617  |
| H12 | 1.522873  | -2.206104 | 0.141165  |
| N13 | -0.601381 | -2.606697 | 0.134846  |
| C14 | -1.605196 | -1.734989 | 0.092204  |
| C15 | -3.048165 | -1.951669 | 0.062127  |
| O16 | -3.657625 | -2.988531 | 0.083759  |
| N17 | -3.735491 | -0.705064 | -0.004533 |
| H18 | -4.744920 | -0.798170 | -0.035000 |
| C19 | -3.162699 | 0.531959  | -0.036098 |
| N20 | -3.927326 | 1.604441  | -0.114615 |
| H21 | -4.933093 | 1.538933  | -0.166449 |

|     |           |           |           |
|-----|-----------|-----------|-----------|
| H22 | -3.501587 | 2.542518  | -0.149500 |
| N23 | -1.820913 | 0.726567  | 0.012903  |
| C24 | -1.122754 | -0.381007 | 0.068618  |
| C25 | 3.481763  | 1.094662  | 0.626728  |
| H26 | 4.344495  | 0.750969  | 1.207167  |
| C27 | 2.158295  | 0.642515  | 1.246818  |
| H28 | 2.281113  | -0.346472 | 1.694881  |
| H29 | 1.785546  | 1.337613  | 2.001398  |
| O30 | 3.520677  | 2.494151  | 0.421210  |
| H31 | 4.209646  | -2.562237 | 0.165718  |
| H32 | 3.732174  | 2.939646  | 1.246637  |
| O33 | -3.074101 | 4.255960  | -0.280122 |
| H34 | -2.741828 | 4.687406  | -1.072594 |
| H35 | -3.069457 | 4.915916  | 0.418959  |

**dGuo<sup>+</sup>·W3'**

|     |           |           |           |
|-----|-----------|-----------|-----------|
| O1  | -2.500962 | -2.576505 | -0.497653 |
| C2  | -3.175868 | -2.250612 | 0.715235  |
| H3  | -2.823536 | -2.889346 | 1.533626  |
| H4  | -4.259006 | -2.384522 | 0.604595  |
| C5  | -2.906307 | -0.801224 | 1.069473  |
| H6  | -3.460311 | -0.554286 | 1.979354  |
| O7  | -1.505626 | -0.619215 | 1.351858  |
| C8  | -0.915110 | 0.245709  | 0.428678  |
| H9  | -0.628116 | 1.189151  | 0.902643  |
| N10 | 0.351950  | -0.381005 | 0.001096  |
| C11 | 0.493458  | -1.664476 | -0.431619 |
| H12 | -0.374698 | -2.309559 | -0.535647 |
| N13 | 1.766596  | -2.012957 | -0.682111 |
| C14 | 2.466663  | -0.924232 | -0.387283 |
| C15 | 3.903374  | -0.676120 | -0.451392 |
| O16 | 4.785668  | -1.413521 | -0.801275 |
| N17 | 4.198558  | 0.652828  | -0.015944 |
| H18 | 5.187746  | 0.877233  | -0.032858 |
| C19 | 3.291856  | 1.574301  | 0.401782  |
| N20 | 3.711228  | 2.771977  | 0.793710  |
| H21 | 4.682614  | 3.042955  | 0.809624  |
| H22 | 3.016626  | 3.436532  | 1.104784  |
| N23 | 1.961110  | 1.350297  | 0.442749  |
| C24 | 1.610491  | 0.143076  | 0.062086  |
| C25 | -3.249301 | 0.225709  | -0.018136 |
| H26 | -4.005491 | -0.163547 | -0.710679 |
| C27 | -1.904811 | 0.432378  | -0.721971 |
| H28 | -1.757785 | -0.342735 | -1.478719 |
| H29 | -1.828545 | 1.415230  | -1.189670 |
| O30 | -3.690308 | 1.390704  | 0.632874  |
| H31 | -2.803113 | -3.434016 | -0.809370 |
| H32 | -3.999027 | 2.023951  | -0.037381 |
| O33 | -4.448330 | 3.056894  | -1.505986 |
| H34 | -4.407459 | 4.011220  | -1.393833 |
| H35 | -5.276192 | 2.879839  | -1.962644 |

**dGuo<sup>+</sup>·85'**

|    |          |           |          |
|----|----------|-----------|----------|
| O1 | 4.201733 | 1.140409  | 0.874779 |
| C2 | 3.960799 | -0.108988 | 1.513678 |
| H3 | 3.619622 | 0.043558  | 2.543661 |

|     |           |           |           |
|-----|-----------|-----------|-----------|
| H4  | 4.878562  | -0.709011 | 1.527230  |
| C5  | 2.910387  | -0.890325 | 0.758916  |
| H6  | 2.879339  | -1.903266 | 1.182044  |
| O7  | 1.629542  | -0.275523 | 0.930573  |
| C8  | 0.859957  | -0.643716 | -0.183392 |
| H9  | 0.456477  | -1.658704 | -0.076019 |
| N10 | -0.301374 | 0.239794  | -0.218503 |
| C11 | -0.294837 | 1.604503  | -0.285140 |
| H12 | 0.637025  | 2.162877  | -0.392752 |
| N13 | -1.521925 | 2.146144  | -0.204503 |
| C14 | -2.337475 | 1.107517  | -0.070753 |
| C15 | -3.790035 | 1.053076  | 0.064056  |
| O16 | -4.585470 | 1.953788  | 0.076954  |
| N17 | -4.227530 | -0.302062 | 0.194513  |
| H18 | -5.232481 | -0.397789 | 0.294816  |
| C19 | -3.429360 | -1.400793 | 0.192008  |
| N20 | -3.972387 | -2.605122 | 0.326856  |
| H21 | -4.963261 | -2.758517 | 0.436661  |
| H22 | -3.354688 | -3.404702 | 0.322850  |
| N23 | -2.086887 | -1.348020 | 0.055608  |
| C24 | -1.608737 | -0.131481 | -0.064029 |
| C25 | 3.126279  | -1.045357 | -0.768010 |
| H26 | 3.974738  | -0.445051 | -1.110449 |
| C27 | 1.808083  | -0.531994 | -1.373866 |
| H28 | 1.913429  | 0.516028  | -1.668192 |
| H29 | 1.489759  | -1.128599 | -2.230635 |
| O30 | 3.350408  | -2.422267 | -1.000891 |
| H31 | 4.906520  | 1.603273  | 1.336262  |
| H32 | 3.750870  | -2.547398 | -1.865886 |
| O33 | 2.481089  | 2.605052  | -0.748731 |
| H34 | 2.862941  | 3.447014  | -1.008247 |
| H35 | 3.103089  | 2.178827  | -0.131432 |

**Guo<sup>+</sup>-W12a**

|     |           |           |           |
|-----|-----------|-----------|-----------|
| O1  | -3.642262 | 1.912982  | 0.401736  |
| C2  | -4.301752 | 1.282933  | -0.689241 |
| H3  | -4.179510 | 1.867047  | -1.608890 |
| H4  | -5.374207 | 1.165286  | -0.487036 |
| C5  | -3.694145 | -0.091973 | -0.901368 |
| H6  | -4.223207 | -0.582182 | -1.725139 |
| O7  | -2.316226 | 0.045629  | -1.295009 |
| C8  | -1.464334 | -0.522958 | -0.347602 |
| H9  | -1.009203 | -1.452353 | -0.706390 |
| N10 | -0.356968 | 0.408463  | -0.121366 |
| C11 | -0.467981 | 1.742832  | 0.128760  |
| H12 | -1.442943 | 2.215755  | 0.179633  |
| N13 | 0.709827  | 2.359917  | 0.294645  |
| C14 | 1.611628  | 1.392941  | 0.146279  |
| C15 | 3.070872  | 1.434988  | 0.221059  |
| O16 | 3.782385  | 2.381238  | 0.442391  |
| N17 | 3.619392  | 0.146110  | -0.009578 |
| H18 | 4.639851  | 0.075828  | 0.024906  |
| C19 | 2.911903  | -0.982755 | -0.272159 |
| N20 | 3.571644  | -2.112674 | -0.475893 |
| H21 | 4.587286  | -2.140134 | -0.435664 |
| H22 | 3.036695  | -2.948178 | -0.662677 |

|     |           |           |           |
|-----|-----------|-----------|-----------|
| N23 | 1.558393  | -1.029110 | -0.338571 |
| C24 | 0.982567  | 0.128780  | -0.125830 |
| C25 | -3.691198 | -1.003755 | 0.335870  |
| H26 | -4.484268 | -0.749297 | 1.045269  |
| C27 | -2.297533 | -0.770125 | 0.930124  |
| H28 | -2.315549 | 0.144365  | 1.528743  |
| O29 | -3.727089 | -2.375065 | -0.017282 |
| H30 | -4.112762 | 2.715373  | 0.644424  |
| H31 | -4.632044 | -2.689276 | -0.089247 |
| O32 | 6.254686  | -1.045415 | -0.120090 |
| H33 | 6.875517  | -0.844819 | -0.829158 |
| H34 | 6.788082  | -1.157332 | 0.674550  |
| O35 | -1.807724 | -1.802515 | 1.721149  |
| H36 | -2.180083 | -2.629307 | 1.383492  |

**Guo<sup>+</sup>-W16**

|     |           |           |           |
|-----|-----------|-----------|-----------|
| O1  | 3.461817  | -2.105376 | 0.453188  |
| C2  | 4.198561  | -1.543460 | -0.625597 |
| H3  | 4.047790  | -2.122702 | -1.544109 |
| H4  | 5.272193  | -1.517210 | -0.398732 |
| C5  | 3.716642  | -0.123487 | -0.861605 |
| H6  | 4.302750  | 0.311004  | -1.677803 |
| O7  | 2.339744  | -0.146840 | -1.283531 |
| C8  | 1.521850  | 0.503095  | -0.359656 |
| H9  | 1.157165  | 1.465721  | -0.734251 |
| N10 | 0.332295  | -0.326341 | -0.149864 |
| C11 | 0.322383  | -1.664127 | 0.104047  |
| H12 | 1.252360  | -2.219596 | 0.165666  |
| N13 | -0.907481 | -2.175095 | 0.259349  |
| C14 | -1.718088 | -1.132579 | 0.101224  |
| C15 | -3.174052 | -1.038485 | 0.157362  |
| O16 | -3.972419 | -1.921668 | 0.362069  |
| N17 | -3.607146 | 0.291092  | -0.068612 |
| H18 | -4.635440 | 0.401726  | -0.016358 |
| C19 | -2.801326 | 1.342945  | -0.336428 |
| N20 | -3.345179 | 2.533312  | -0.560579 |
| H21 | -4.342839 | 2.683202  | -0.563626 |
| H22 | -2.729114 | 3.310324  | -0.751942 |
| N23 | -1.448512 | 1.272280  | -0.391267 |
| C24 | -0.977015 | 0.070533  | -0.167843 |
| C25 | 3.765308  | 0.797888  | 0.367565  |
| H26 | 4.521127  | 0.486213  | 1.094588  |
| C27 | 2.345678  | 0.685500  | 0.935087  |
| H28 | 2.274119  | -0.224028 | 1.537167  |
| O29 | 3.919634  | 2.158016  | 0.004274  |
| H30 | 3.857222  | -2.941930 | 0.713949  |
| H31 | 4.848274  | 2.397632  | -0.051498 |
| O32 | -6.317514 | -0.045074 | 0.089641  |
| H33 | -7.165909 | 0.268064  | 0.415112  |
| H34 | -6.287130 | -0.999125 | 0.234309  |
| O35 | 1.929015  | 1.760515  | 1.710869  |
| H36 | 2.377736  | 2.550454  | 1.377334  |

**Guo<sup>+</sup>-W2b**

|    |          |           |           |
|----|----------|-----------|-----------|
| O1 | 3.559244 | -1.894915 | 0.219461  |
| C2 | 4.138630 | -1.121448 | -0.823466 |

|     |           |           |           |
|-----|-----------|-----------|-----------|
| H3  | 4.036101  | -1.630424 | -1.789051 |
| H4  | 5.204215  | -0.939334 | -0.633176 |
| C5  | 3.422734  | 0.214995  | -0.899822 |
| H6  | 3.895752  | 0.816777  | -1.682596 |
| O7  | 2.050759  | 0.007840  | -1.284528 |
| C8  | 1.178956  | 0.411388  | -0.272112 |
| H9  | 0.642384  | 1.330650  | -0.530360 |
| N10 | 0.155494  | -0.624619 | -0.118695 |
| C11 | 0.378906  | -1.962371 | 0.004535  |
| H12 | 1.389301  | -2.357063 | -0.002313 |
| N13 | -0.741433 | -2.687000 | 0.125272  |
| C14 | -1.720623 | -1.787688 | 0.077558  |
| C15 | -3.167499 | -1.958276 | 0.161157  |
| O16 | -3.802513 | -2.970669 | 0.299481  |
| N17 | -3.822045 | -0.697540 | 0.053553  |
| H18 | -4.832860 | -0.757648 | 0.108787  |
| C19 | -3.217860 | 0.514272  | -0.107900 |
| N20 | -3.955010 | 1.604706  | -0.198137 |
| H21 | -4.962596 | 1.572121  | -0.150876 |
| H22 | -3.507112 | 2.525900  | -0.311786 |
| N23 | -1.871652 | 0.665577  | -0.181063 |
| C24 | -1.203271 | -0.456490 | -0.082781 |
| C25 | 3.376489  | 1.007199  | 0.416108  |
| H26 | 4.204542  | 0.756109  | 1.085685  |
| C27 | 2.021459  | 0.603681  | 1.008791  |
| H28 | 2.129012  | -0.358344 | 1.516137  |
| O29 | 3.292375  | 2.403819  | 0.192302  |
| H30 | 4.095854  | -2.676404 | 0.379029  |
| H31 | 4.167655  | 2.794989  | 0.130845  |
| O32 | -3.079262 | 4.235283  | -0.495089 |
| H33 | -2.940297 | 4.707787  | -1.320758 |
| H34 | -2.835323 | 4.835870  | 0.214921  |
| O35 | 1.471212  | 1.514177  | 1.903844  |
| H36 | 1.773833  | 2.395294  | 1.642822  |

**Guo<sup>+</sup>·W3'**

|     |           |           |           |
|-----|-----------|-----------|-----------|
| O1  | 2.322411  | -2.556210 | 0.473925  |
| C2  | 3.149248  | -2.072966 | -0.579053 |
| H3  | 2.959168  | -2.628193 | -1.505350 |
| H4  | 4.211647  | -2.169976 | -0.322363 |
| C5  | 2.841641  | -0.606276 | -0.814390 |
| H6  | 3.490773  | -0.239809 | -1.615330 |
| O7  | 1.476880  | -0.467606 | -1.262518 |
| C8  | 0.727199  | 0.267913  | -0.347766 |
| H9  | 0.475363  | 1.265630  | -0.722387 |
| N10 | -0.552421 | -0.428893 | -0.156398 |
| C11 | -0.710113 | -1.761103 | 0.073114  |
| H12 | 0.152095  | -2.418380 | 0.123648  |
| N13 | -1.991223 | -2.134822 | 0.225406  |
| C14 | -2.678418 | -1.006618 | 0.090756  |
| C15 | -4.115129 | -0.759494 | 0.158103  |
| O16 | -5.009682 | -1.537367 | 0.357357  |
| N17 | -4.392142 | 0.626085  | -0.054657 |
| H18 | -5.379309 | 0.855869  | -0.013646 |
| C19 | -3.469690 | 1.595012  | -0.291968 |
| N20 | -3.869663 | 2.847483  | -0.477646 |

|     |           |           |           |
|-----|-----------|-----------|-----------|
| H21 | -4.836807 | 3.132293  | -0.450922 |
| H22 | -3.160436 | 3.548539  | -0.640434 |
| N23 | -2.140721 | 1.365344  | -0.353328 |
| C24 | -1.806790 | 0.111377  | -0.158514 |
| C25 | 2.976007  | 0.302675  | 0.417424  |
| H26 | 3.677953  | -0.106298 | 1.151860  |
| C27 | 1.543922  | 0.357215  | 0.961221  |
| H28 | 1.348538  | -0.530051 | 1.569378  |
| O29 | 3.301380  | 1.627373  | 0.069966  |
| H30 | 2.629137  | -3.423391 | 0.752736  |
| H31 | 4.267566  | 1.712102  | -0.023294 |
| O32 | 6.047553  | 1.532998  | -0.179189 |
| H33 | 6.481978  | 1.847947  | -0.977555 |
| H34 | 6.626814  | 1.766204  | 0.552536  |
| O35 | 1.248546  | 1.488602  | 1.713839  |
| H36 | 1.834736  | 2.192404  | 1.396878  |

**Guo<sup>+</sup>·W85'**

|     |           |           |           |
|-----|-----------|-----------|-----------|
| O1  | -4.147352 | 1.410930  | -0.990755 |
| C2  | -3.916132 | 0.193783  | -1.688839 |
| H3  | -3.579197 | 0.390500  | -2.712569 |
| H4  | -4.834184 | -0.405449 | -1.725605 |
| C5  | -2.859382 | -0.615913 | -0.974733 |
| H6  | -2.807248 | -1.600889 | -1.461467 |
| O7  | -1.591625 | 0.033854  | -1.090447 |
| C8  | -0.776362 | -0.542251 | -0.110329 |
| H9  | -0.399138 | -1.531047 | -0.405365 |
| N10 | 0.394362  | 0.305996  | 0.049821  |
| C11 | 0.404369  | 1.642176  | 0.333062  |
| H12 | -0.525539 | 2.188850  | 0.492076  |
| N13 | 1.640785  | 2.162863  | 0.395578  |
| C14 | 2.446923  | 1.138355  | 0.144339  |
| C15 | 3.903653  | 1.072214  | 0.076849  |
| O16 | 4.711525  | 1.946966  | 0.239458  |
| N17 | 4.327872  | -0.257940 | -0.231254 |
| H18 | 5.335492  | -0.361484 | -0.286806 |
| C19 | 3.514638  | -1.325477 | -0.439297 |
| N20 | 4.046572  | -2.508785 | -0.722290 |
| H21 | 5.039956  | -2.669157 | -0.791753 |
| H22 | 3.417441  | -3.286780 | -0.862986 |
| N23 | 2.167360  | -1.261955 | -0.374814 |
| C24 | 1.702132  | -0.069056 | -0.089323 |
| C25 | -3.074694 | -0.863927 | 0.533392  |
| H26 | -3.779738 | -0.146676 | 0.958778  |
| C27 | -1.656934 | -0.668240 | 1.150487  |
| H28 | -1.627566 | 0.273018  | 1.705616  |
| O29 | -3.519326 | -2.193744 | 0.717713  |
| H30 | -4.785098 | 1.944412  | -1.472898 |
| H31 | -4.215430 | -2.225196 | 1.379525  |
| O32 | -2.423328 | 2.459489  | 0.931895  |
| H33 | -2.810157 | 3.205081  | 1.397646  |
| H34 | -3.034593 | 2.220171  | 0.212660  |
| O35 | -1.251229 | -1.703587 | 1.988157  |
| H36 | -1.792249 | -2.477858 | 1.772041  |



**Guo<sup>+</sup>·W2'3'**

|     |           |           |           |
|-----|-----------|-----------|-----------|
| O1  | -2.555535 | -2.510526 | -0.561497 |
| C2  | -3.232813 | -2.256576 | 0.661688  |
| H3  | -2.934394 | -2.981953 | 1.427663  |
| H4  | -4.320730 | -2.313441 | 0.527684  |
| C5  | -2.877116 | -0.862295 | 1.148337  |
| H6  | -3.418260 | -0.690584 | 2.086263  |
| O7  | -1.473137 | -0.794526 | 1.450283  |
| C8  | -0.832387 | 0.121196  | 0.614826  |
| H9  | -0.538899 | 1.035125  | 1.140359  |
| N10 | 0.409969  | -0.499575 | 0.141814  |
| C11 | 0.523928  | -1.737978 | -0.412756 |
| H12 | -0.351007 | -2.366763 | -0.542981 |
| N13 | 1.780444  | -2.064002 | -0.752136 |
| C14 | 2.498499  | -1.001674 | -0.404464 |
| C15 | 3.930689  | -0.747867 | -0.523295 |
| O16 | 4.790632  | -1.455275 | -0.976162 |
| N17 | 4.252082  | 0.543059  | -0.002118 |
| H18 | 5.237932  | 0.774269  | -0.063188 |
| C19 | 3.370630  | 1.425901  | 0.536231  |
| N20 | 3.808816  | 2.594089  | 0.989868  |
| H21 | 4.776752  | 2.875771  | 0.958035  |
| H22 | 3.127736  | 3.235053  | 1.372751  |
| N23 | 2.045603  | 1.189943  | 0.644250  |
| C24 | 1.671508  | 0.023114  | 0.176309  |
| C25 | -3.159535 | 0.279705  | 0.154207  |
| H26 | -3.939753 | 0.012077  | -0.566717 |
| C27 | -1.794248 | 0.448913  | -0.534162 |
| H28 | -1.728815 | -0.346423 | -1.290243 |
| O29 | -3.482912 | 1.494750  | 0.813457  |
| H30 | -2.895407 | -3.318443 | -0.956449 |
| H31 | -4.255206 | 1.359311  | 1.371771  |
| O32 | -3.932352 | 2.586245  | -1.744618 |
| O33 | -1.458226 | 1.690316  | -1.054185 |
| H34 | -2.216128 | 2.059887  | -1.545917 |
| H35 | -4.070647 | 2.708070  | -0.794906 |
| H36 | -4.254252 | 3.370940  | -2.195607 |

**Cartesian coordinates for the structures in Fig. 5, optimized at  $\omega$ B97XD/6-31+G(d,p).**

**9HG<sup>•+</sup>\_keto**

|     |           |           |           |
|-----|-----------|-----------|-----------|
| C1  | -0.246525 | 1.479497  | 0.000004  |
| C2  | 0.854816  | 0.518755  | 0.000002  |
| H3  | -2.305573 | 1.419067  | 0.000005  |
| C4  | -1.679426 | -0.548633 | 0.000006  |
| C5  | 2.692392  | -0.514115 | -0.000013 |
| N6  | -1.503772 | 0.796299  | 0.000005  |
| N7  | 2.171493  | 0.715558  | -0.000015 |
| N8  | 1.751847  | -1.500377 | 0.000006  |
| N9  | -0.652665 | -1.437674 | 0.000017  |
| C10 | 0.531203  | -0.880468 | 0.000012  |
| N11 | -2.901167 | -1.058213 | -0.000036 |
| H12 | -2.995044 | -2.065277 | 0.000073  |
| H13 | -3.739392 | -0.495433 | -0.000028 |
| O14 | -0.200466 | 2.678487  | 0.000007  |
| H15 | 3.753107  | -0.726499 | -0.000026 |
| H16 | 1.915718  | -2.499117 | 0.000006  |

**9HG<sup>•+</sup>\_keto·W16**

|     |           |           |           |
|-----|-----------|-----------|-----------|
| C1  | -0.429751 | -1.044077 | -0.000001 |
| C2  | 0.996756  | -0.723291 | -0.000001 |
| H3  | -2.237034 | -0.053917 | -0.000014 |
| C4  | -0.737314 | 1.396791  | -0.000001 |
| C5  | 3.104682  | -0.679664 | 0.000000  |
| N6  | -1.217011 | 0.135122  | -0.000007 |
| N7  | 2.066610  | -1.518154 | 0.000000  |
| N8  | 2.741407  | 0.633767  | 0.000000  |
| N9  | 0.588791  | 1.709892  | 0.000000  |
| C10 | 1.371220  | 0.662598  | -0.000001 |
| N11 | -1.581984 | 2.417484  | 0.000004  |
| H12 | -1.202138 | 3.354074  | 0.000008  |
| H13 | -2.584000 | 2.294865  | 0.000014  |
| O14 | -0.945371 | -2.134143 | 0.000003  |
| H15 | 4.140416  | -0.991647 | 0.000001  |
| H16 | 3.356929  | 1.436604  | 0.000001  |
| O17 | -3.720634 | -0.940987 | 0.000014  |
| H18 | -4.680018 | -0.883441 | -0.000121 |
| H19 | -3.484362 | -1.876415 | 0.000030  |

**water-assisted TS**

|     |           |           |           |
|-----|-----------|-----------|-----------|
| C1  | 1.353054  | 0.650023  | 0.006672  |
| C2  | 0.891686  | -0.705081 | 0.002081  |
| C3  | -0.549988 | -0.904648 | -0.003364 |
| N4  | -1.305904 | 0.248283  | 0.012458  |
| C5  | -0.724994 | 1.459845  | 0.002131  |
| N6  | 0.625999  | 1.730345  | 0.006446  |
| N7  | 2.722638  | 0.533542  | 0.007848  |
| C8  | 2.998142  | -0.798977 | 0.002956  |
| N9  | 1.908410  | -1.570145 | -0.000587 |
| O10 | -1.088418 | -2.022812 | -0.021174 |
| H11 | 4.010765  | -1.179201 | 0.002022  |
| N12 | -1.496929 | 2.541254  | -0.012053 |

|     |           |           |           |
|-----|-----------|-----------|-----------|
| H13 | -2.502119 | 2.472434  | -0.045691 |
| H14 | -1.061785 | 3.452641  | -0.024206 |
| H15 | 3.389435  | 1.293890  | 0.008708  |
| H16 | -2.728962 | -0.275838 | 0.014351  |
| O17 | -3.358310 | -1.136627 | -0.070386 |
| H18 | -2.549581 | -1.811810 | -0.050637 |
| H19 | -3.970828 | -1.266530 | 0.666276  |

**TS (no water)**

|     |           |           |           |
|-----|-----------|-----------|-----------|
| C1  | -0.343249 | 1.369789  | 0.000186  |
| C2  | 0.854464  | 0.577088  | 0.000109  |
| H3  | -1.818639 | 1.985859  | 0.000184  |
| C4  | -1.633678 | -0.636593 | -0.000111 |
| C5  | 2.746413  | -0.347727 | 0.000007  |
| N6  | -1.531133 | 0.702410  | 0.000074  |
| N7  | 2.157055  | 0.853423  | 0.000167  |
| N8  | 1.870570  | -1.385192 | -0.000157 |
| N9  | -0.536236 | -1.470634 | -0.000213 |
| C10 | 0.606102  | -0.844505 | -0.000099 |
| N11 | -2.817769 | -1.219876 | -0.000211 |
| H12 | -2.868855 | -2.229601 | -0.000368 |
| H13 | -3.670605 | -0.678106 | -0.000148 |
| O14 | -0.616966 | 2.589990  | 0.000307  |
| H15 | 3.818118  | -0.495778 | 0.000003  |
| H16 | 2.097990  | -2.371524 | -0.000303 |

**9HG<sup>•+</sup>\_enol·W6**

|     |           |           |           |
|-----|-----------|-----------|-----------|
| C1  | 0.706519  | -0.502708 | 0.021542  |
| C2  | -0.712806 | -0.791376 | 0.008890  |
| H3  | 4.593538  | -0.749644 | 0.726199  |
| C4  | 0.162735  | 1.733927  | 0.002018  |
| C5  | -2.685085 | -1.536345 | -0.006434 |
| N6  | 1.096544  | 0.756087  | 0.022683  |
| N7  | -1.408904 | -1.931034 | 0.008096  |
| N8  | -2.839560 | -0.186063 | -0.015254 |
| N9  | -1.210160 | 1.602138  | -0.010562 |
| C10 | -1.573726 | 0.353313  | -0.005809 |
| N11 | 0.603717  | 2.981955  | -0.007852 |
| H12 | -0.054079 | 3.748932  | -0.024639 |
| H13 | 1.598230  | 3.161600  | -0.007304 |
| O14 | 1.536075  | -1.487274 | 0.033803  |
| H15 | -3.528274 | -2.213884 | -0.010821 |
| H16 | -3.710566 | 0.327677  | -0.027037 |
| O17 | 4.077318  | -0.965030 | -0.056741 |
| H18 | 4.614050  | -1.554254 | -0.596656 |
| H19 | 2.502674  | -1.204452 | 0.022748  |

**9HG<sup>•+</sup>\_enol**

|    |           |           |           |
|----|-----------|-----------|-----------|
| C1 | -0.372887 | 1.332424  | -0.000003 |
| C2 | 0.800774  | 0.493895  | -0.000003 |
| C3 | -1.656236 | -0.574521 | 0.000006  |
| C4 | 2.680229  | -0.458597 | -0.000006 |
| N5 | -1.560826 | 0.781169  | 0.000002  |
| N6 | 2.109729  | 0.751019  | -0.000007 |
| N7 | 1.788705  | -1.483340 | -0.000001 |
| N8 | -0.630503 | -1.490286 | 0.000006  |

|     |           |           |           |
|-----|-----------|-----------|-----------|
| C9  | 0.536193  | -0.915212 | 0.000001  |
| N10 | -2.874420 | -1.085256 | 0.000011  |
| H11 | -3.000036 | -2.088901 | 0.000013  |
| H12 | -3.678960 | -0.472296 | 0.000012  |
| O13 | -0.218106 | 2.625883  | -0.000007 |
| H14 | 3.749442  | -0.623487 | -0.000008 |
| H15 | 1.998901  | -2.473098 | 0.000001  |
| H16 | -1.081726 | 3.069639  | -0.000006 |

**Cartesian coordinates for the structures in  
Fig. 6, optimized at  $\omega$ B97XD/6-31+G(d,p).**

**9HG<sup>+</sup>**

|     |           |           |           |
|-----|-----------|-----------|-----------|
| C1  | -0.246525 | 1.479497  | 0.000004  |
| C2  | 0.854816  | 0.518755  | 0.000002  |
| H3  | -2.305573 | 1.419067  | 0.000005  |
| C4  | -1.679426 | -0.548633 | 0.000006  |
| C5  | 2.692392  | -0.514115 | -0.000013 |
| N6  | -1.503772 | 0.796299  | 0.000005  |
| N7  | 2.171493  | 0.715558  | -0.000015 |
| N8  | 1.751847  | -1.500377 | 0.000006  |
| N9  | -0.652665 | -1.437674 | 0.000017  |
| C10 | 0.531203  | -0.880468 | 0.000012  |
| N11 | -2.901167 | -1.058213 | -0.000036 |
| H12 | -2.995044 | -2.065277 | 0.000073  |
| H13 | -3.739392 | -0.495433 | -0.000028 |
| O14 | -0.200466 | 2.678487  | 0.000007  |
| H15 | 3.753107  | -0.726499 | -0.000026 |
| H16 | 1.915718  | -2.499117 | 0.000006  |

**9HG<sup>+</sup>·W**

|     |           |           |           |
|-----|-----------|-----------|-----------|
| C1  | -0.235186 | 1.386170  | -0.496027 |
| C2  | 0.869041  | 0.437303  | -0.385743 |
| H3  | -2.288017 | 1.320063  | -0.540630 |
| C4  | -1.656460 | -0.625374 | -0.279724 |
| C5  | 2.707871  | -0.572730 | -0.204491 |
| N6  | -1.485010 | 0.703088  | -0.481417 |
| N7  | 2.184875  | 0.642261  | -0.373768 |
| N8  | 1.769640  | -1.558433 | -0.104233 |
| N9  | -0.633136 | -1.506413 | -0.156677 |
| C10 | 0.549032  | -0.951008 | -0.212740 |
| N11 | -2.880906 | -1.128893 | -0.209039 |
| H12 | -2.975550 | -2.126843 | -0.080147 |
| H13 | -3.716961 | -0.569624 | -0.288533 |
| O14 | -0.188787 | 2.583351  | -0.592962 |
| H15 | 3.768312  | -0.778504 | -0.151034 |
| O16 | -0.143212 | 0.557265  | 2.342061  |
| H17 | 0.174657  | 1.412965  | 2.648925  |
| H18 | -0.336528 | 0.057008  | 3.140547  |
| H19 | 1.936057  | -2.547425 | 0.026355  |

**9HG<sup>+</sup>·2W**

|     |           |           |           |
|-----|-----------|-----------|-----------|
| C1  | 0.077789  | 1.055505  | 0.927226  |
| C2  | -0.475097 | -0.273597 | 0.691760  |
| H3  | 1.868065  | 2.019609  | 0.648895  |
| C4  | 2.130694  | 0.098317  | -0.055492 |
| C5  | -1.667828 | -1.990860 | 0.425240  |
| N6  | 1.442619  | 1.105822  | 0.536580  |
| N7  | -1.710537 | -0.738928 | 0.882670  |
| N8  | -0.443050 | -2.351395 | -0.049433 |
| N9  | 1.620655  | -1.138551 | -0.270566 |
| C10 | 0.370660  | -1.260352 | 0.086758  |
| N11 | 3.383223  | 0.297201  | -0.440532 |
| H12 | 3.873733  | -0.474587 | -0.870915 |

|     |           |           |           |
|-----|-----------|-----------|-----------|
| H13 | 3.861680  | 1.179680  | -0.339165 |
| O14 | -0.473770 | 2.018589  | 1.392316  |
| H15 | -2.509024 | -2.670438 | 0.424117  |
| O16 | -0.504692 | 0.643536  | -1.909828 |
| H17 | -3.029132 | 1.021909  | 0.026676  |
| H18 | -0.443292 | 0.639401  | -2.868239 |
| H19 | -0.187399 | -3.239772 | -0.459653 |
| O20 | -2.943040 | 1.374391  | -0.867133 |
| H21 | -1.394086 | 0.987303  | -1.690649 |
| H22 | -3.336200 | 2.251642  | -0.857890 |

**TS1·W**

|     |           |           |           |
|-----|-----------|-----------|-----------|
| C1  | -0.695172 | 1.475590  | -0.058911 |
| C2  | 0.410628  | 0.558655  | -0.242194 |
| H3  | -2.732076 | 1.355220  | 0.194939  |
| C4  | -2.050124 | -0.594983 | 0.089494  |
| C5  | 2.359515  | -0.479463 | -0.417326 |
| N6  | -1.919800 | 0.758291  | 0.082775  |
| N7  | 1.718277  | 0.811803  | -0.416545 |
| N8  | 1.366907  | -1.458842 | -0.286031 |
| N9  | -1.007236 | -1.436275 | -0.015964 |
| C10 | 0.152618  | -0.840861 | -0.172225 |
| N11 | -3.260833 | -1.132270 | 0.217015  |
| H12 | -3.331847 | -2.139473 | 0.225928  |
| H13 | -4.104354 | -0.586485 | 0.298153  |
| O14 | -0.676992 | 2.681657  | -0.024813 |
| H15 | 3.128932  | -0.671481 | -1.164398 |
| O16 | 3.113401  | -0.144274 | 0.907113  |
| H17 | 2.618255  | 0.887266  | 0.645063  |
| H18 | 4.083539  | -0.201933 | 0.864458  |
| H19 | 1.500275  | -2.454767 | -0.384324 |

**TS1·2W**

|     |           |           |           |
|-----|-----------|-----------|-----------|
| C1  | 0.822723  | 1.442696  | 0.251264  |
| C2  | -0.089196 | 0.330084  | 0.402271  |
| H3  | 2.814347  | 1.720909  | -0.168302 |
| C4  | 2.493070  | -0.323038 | -0.232781 |
| C5  | -1.800503 | -1.014992 | 0.639005  |
| N6  | 2.131010  | 0.979855  | -0.062218 |
| N7  | -1.384819 | 0.338032  | 0.721232  |
| N8  | -0.663453 | -1.809134 | 0.350405  |
| N9  | 1.635841  | -1.344176 | -0.132276 |
| C10 | 0.403739  | -0.982721 | 0.173795  |
| N11 | 3.766824  | -0.603194 | -0.521189 |
| H12 | 4.019124  | -1.572034 | -0.646246 |
| H13 | 4.481002  | 0.100613  | -0.614640 |
| O14 | 0.591526  | 2.626650  | 0.354797  |
| H15 | -2.412528 | -1.373228 | 1.468710  |
| O16 | -2.788418 | -1.048620 | -0.576631 |
| H17 | -2.667629 | 1.525614  | -0.118830 |
| H18 | -3.462577 | -1.738796 | -0.500759 |
| H19 | -0.618059 | -2.816638 | 0.367997  |
| O20 | -3.323049 | 1.268450  | -0.810234 |
| H21 | -3.199455 | 0.035357  | -0.756279 |
| H22 | -4.171523 | 1.704505  | -0.668107 |

**[8-OH-9HG + H]<sup>+</sup>**

|     |           |           |           |
|-----|-----------|-----------|-----------|
| C1  | 0.807780  | 1.466867  | 0.000120  |
| C2  | -0.348310 | 0.625481  | 0.152319  |
| H3  | 2.836623  | 1.220552  | -0.199907 |
| C4  | 2.021148  | -0.682284 | -0.059645 |
| C5  | -2.470098 | -0.290208 | 0.308059  |
| N6  | 1.983957  | 0.681870  | -0.094869 |
| N7  | -1.645993 | 0.926317  | 0.286659  |
| N8  | -1.430980 | -1.312860 | 0.333409  |
| N9  | 0.932898  | -1.451555 | 0.076548  |
| C10 | -0.204799 | -0.793273 | 0.179986  |
| N11 | 3.198082  | -1.293166 | -0.165871 |
| H12 | 3.208468  | -2.302722 | -0.139946 |
| H13 | 4.071672  | -0.802919 | -0.277639 |
| O14 | 0.836244  | 2.677103  | -0.046268 |
| H15 | -3.073181 | -0.319457 | 1.222437  |
| O16 | -3.245768 | -0.399906 | -0.826164 |
| H17 | -2.038137 | 1.853217  | 0.182835  |
| H18 | -4.185681 | -0.381220 | -0.616938 |
| H19 | -1.643644 | -2.298765 | 0.272440  |

**[8-OH-9HG + H]<sup>+</sup>-W**

|     |           |           |           |
|-----|-----------|-----------|-----------|
| C1  | -0.508494 | 1.374975  | 0.042606  |
| C2  | 0.252134  | 0.167577  | -0.115447 |
| H3  | -2.478580 | 1.911099  | 0.216555  |
| C4  | -2.440850 | -0.157457 | 0.042669  |
| C5  | 1.866073  | -1.467526 | -0.296165 |
| N6  | -1.890397 | 1.092266  | 0.109787  |
| N7  | 1.567780  | -0.034011 | -0.220161 |
| N8  | 0.522687  | -2.028873 | -0.347690 |
| N9  | -1.723690 | -1.275108 | -0.105430 |
| C10 | -0.418250 | -1.089886 | -0.183879 |
| N11 | -3.764797 | -0.275055 | 0.127627  |
| H12 | -4.158170 | -1.203569 | 0.076070  |
| H13 | -4.387177 | 0.508396  | 0.246887  |
| O14 | -0.095989 | 2.519207  | 0.116204  |
| H15 | 2.421763  | -1.682241 | -1.216402 |
| O16 | 2.523975  | -1.936295 | 0.823616  |
| H17 | 2.266709  | 0.729861  | -0.166784 |
| H18 | 3.456153  | -2.095748 | 0.641344  |
| H19 | 0.352235  | -3.023658 | -0.304023 |
| O20 | 2.766835  | 2.382664  | -0.132194 |
| H21 | 3.519992  | 2.904431  | 0.155769  |
| H22 | 1.963741  | 2.906185  | 0.001930  |

**TS2**

|    |           |           |           |
|----|-----------|-----------|-----------|
| C1 | 0.840735  | 1.467061  | -0.010457 |
| C2 | -0.312812 | 0.611231  | -0.043946 |
| H3 | 2.870181  | 1.205211  | 0.006992  |
| C4 | 2.049386  | -0.704225 | -0.005386 |
| C5 | -2.345159 | -0.261367 | 0.066572  |
| N6 | 2.009198  | 0.669881  | -0.009119 |
| N7 | -1.662050 | 0.899103  | -0.043395 |
| N8 | -1.448049 | -1.279059 | -0.002593 |
| N9 | 0.961819  | -1.463272 | -0.006675 |

|     |           |           |           |
|-----|-----------|-----------|-----------|
| C10 | -0.169798 | -0.760610 | -0.027101 |
| N11 | 3.248351  | -1.296969 | 0.004197  |
| H12 | 3.276220  | -2.305319 | 0.005224  |
| H13 | 4.118016  | -0.789720 | -0.000779 |
| O14 | 0.876780  | 2.676779  | 0.008235  |
| H15 | -2.500455 | -0.171676 | 1.943261  |
| O16 | -3.616785 | -0.486248 | -0.208391 |
| H17 | -2.063039 | 1.828831  | -0.065751 |
| H18 | -4.221306 | 0.147567  | 0.199261  |
| H19 | -1.698575 | -2.259474 | 0.038048  |

**TS2-W**

|     |           |           |           |
|-----|-----------|-----------|-----------|
| C1  | 0.606639  | 1.353720  | -0.011577 |
| C2  | -0.208637 | 0.178298  | -0.046554 |
| H3  | 2.604049  | 1.776844  | 0.009941  |
| C4  | 2.453918  | -0.297756 | -0.007010 |
| C5  | -1.842758 | -1.289343 | 0.068747  |
| N6  | 1.965777  | 0.989382  | -0.010148 |
| N7  | -1.579284 | 0.023483  | -0.047826 |
| N8  | -0.665228 | -1.975386 | -0.006414 |
| N9  | 1.675168  | -1.368044 | -0.008735 |
| C10 | 0.374492  | -1.073556 | -0.028856 |
| N11 | 3.782572  | -0.462029 | 0.002254  |
| H12 | 4.140322  | -1.405084 | 0.004062  |
| H13 | 4.436947  | 0.302812  | -0.002056 |
| O14 | 0.260905  | 2.523950  | 0.010483  |
| H15 | -1.991720 | -1.242995 | 1.906331  |
| O16 | -2.975045 | -1.919753 | -0.189180 |
| H17 | -2.233278 | 0.842884  | -0.052464 |
| H18 | -3.754017 | -1.431497 | 0.107358  |
| H19 | -0.587879 | -2.983084 | 0.045578  |
| O20 | -2.567456 | 2.458330  | 0.042810  |
| H21 | -3.218595 | 3.065226  | -0.318497 |
| H22 | -1.698015 | 2.894660  | 0.034439  |

**TS3**

|     |           |           |           |
|-----|-----------|-----------|-----------|
| C1  | -0.849234 | 1.466252  | 0.002758  |
| C2  | 0.326174  | 0.627267  | -0.022648 |
| H3  | -2.885486 | 1.206977  | 0.032006  |
| C4  | -2.049835 | -0.691334 | 0.012018  |
| C5  | 2.419636  | -0.276407 | -0.105639 |
| N6  | -2.022854 | 0.672687  | 0.015046  |
| N7  | 1.631600  | 0.922400  | -0.011422 |
| N8  | 1.442226  | -1.301050 | -0.023429 |
| N9  | -0.942356 | -1.456612 | -0.010420 |
| C10 | 0.189739  | -0.794359 | -0.024874 |
| N11 | -3.219387 | -1.315443 | 0.029967  |
| H12 | -3.215141 | -2.326457 | 0.029218  |
| H13 | -4.107348 | -0.836741 | 0.049948  |
| O14 | -0.885448 | 2.673652  | 0.014400  |
| H15 | 2.750697  | -0.249628 | -1.569557 |
| O16 | 3.601913  | -0.383435 | 0.381834  |
| H17 | 2.047878  | 1.845173  | 0.044128  |
| H18 | 3.540158  | -0.323747 | -0.954952 |
| H19 | 1.694027  | -2.279711 | 0.031452  |

**8-OH-9HG<sup>+</sup>**

|     |           |           |           |
|-----|-----------|-----------|-----------|
| C1  | -0.803512 | 1.467332  | -0.000001 |
| C2  | 0.339501  | 0.604898  | -0.000034 |
| H3  | -2.834826 | 1.213418  | 0.000033  |
| C4  | -2.024900 | -0.699771 | 0.000003  |
| C5  | 2.362630  | -0.275584 | -0.000004 |
| N6  | -1.976784 | 0.673319  | 0.000012  |
| N7  | 1.708805  | 0.883701  | -0.000024 |
| N8  | 1.478154  | -1.286299 | 0.000013  |
| N9  | -0.940472 | -1.462253 | 0.000000  |
| C10 | 0.190489  | -0.756584 | -0.000012 |
| N11 | -3.228263 | -1.287342 | -0.000006 |
| H12 | -3.261519 | -2.295238 | -0.000006 |
| H13 | -4.094799 | -0.775213 | 0.000011  |
| O14 | -0.838402 | 2.678275  | 0.000019  |
| O15 | 3.648241  | -0.510553 | 0.000005  |
| H16 | 2.110417  | 1.812978  | -0.000085 |
| H17 | 4.201652  | 0.281111  | 0.000135  |
| H18 | 1.725023  | -2.268475 | 0.000035  |

**8-OH-9HG<sup>+</sup>-W**

|     |           |           |           |
|-----|-----------|-----------|-----------|
| C1  | -0.567401 | 1.344615  | 0.007860  |
| C2  | 0.229294  | 0.161662  | 0.012679  |
| H3  | -2.559961 | 1.790719  | -0.000775 |
| C4  | -2.435687 | -0.285103 | -0.001818 |
| C5  | 1.841785  | -1.320631 | 0.002833  |
| N6  | -1.931607 | 0.995164  | 0.003488  |
| N7  | 1.612743  | -0.018400 | 0.013542  |
| N8  | 0.673651  | -1.996149 | -0.001163 |
| N9  | -1.668314 | -1.362981 | -0.002543 |
| C10 | -0.365246 | -1.075633 | 0.003666  |
| N11 | -3.767637 | -0.433716 | -0.006670 |
| H12 | -4.136945 | -1.372028 | -0.012028 |
| H13 | -4.412147 | 0.339215  | -0.007680 |
| O14 | -0.211911 | 2.513863  | 0.006323  |
| O15 | 2.981735  | -1.963669 | -0.001129 |
| H16 | 2.274577  | 0.794094  | 0.022099  |
| H17 | 3.751666  | -1.380620 | -0.023177 |
| H18 | 0.587037  | -3.004414 | -0.011691 |
| O19 | 2.590537  | 2.413621  | -0.052123 |
| H20 | 3.250641  | 3.047265  | 0.239562  |
| H21 | 1.713932  | 2.838353  | -0.028782 |

**8O-9HG<sup>+</sup>**

|     |           |           |           |
|-----|-----------|-----------|-----------|
| C1  | -0.757104 | 1.466819  | 0.000005  |
| C2  | 0.408564  | 0.612986  | 0.000003  |
| H3  | -2.796167 | 1.233224  | -0.000055 |
| C4  | -1.983858 | -0.675768 | 0.000011  |
| C5  | 2.474613  | -0.310180 | 0.000000  |
| N6  | -1.939937 | 0.688282  | 0.000020  |
| N7  | 1.718933  | 0.892552  | -0.000001 |
| N8  | 1.502359  | -1.329379 | 0.000003  |
| N9  | -0.885611 | -1.455162 | 0.000011  |
| C10 | 0.255021  | -0.808086 | 0.000001  |
| N11 | -3.160663 | -1.285072 | -0.000130 |
| H12 | -3.169152 | -2.296182 | 0.000246  |

|     |           |           |           |
|-----|-----------|-----------|-----------|
| H13 | -4.042955 | -0.795344 | 0.000439  |
| O14 | -0.776689 | 2.674306  | -0.000006 |
| O15 | 3.662986  | -0.416118 | -0.000001 |
| H16 | 1.742572  | -2.312713 | 0.000000  |
| H17 | 2.146346  | 1.812335  | -0.000007 |

**8O-9HG<sup>+</sup> (enol)**

|     |           |           |           |
|-----|-----------|-----------|-----------|
| C1  | -0.763137 | 1.480362  | 0.000002  |
| C2  | 0.421160  | 0.629856  | -0.000008 |
| H3  | -2.804604 | 1.227401  | 0.000003  |
| C4  | -1.997772 | -0.674809 | 0.000000  |
| C5  | 2.341145  | -0.226048 | 0.000014  |
| N6  | -1.948203 | 0.682716  | -0.000021 |
| N7  | 1.715991  | 0.953602  | -0.000007 |
| N8  | 1.501260  | -1.304176 | 0.000005  |
| N9  | -0.895487 | -1.458533 | 0.000011  |
| C10 | 0.230173  | -0.792369 | 0.000010  |
| N11 | -3.172114 | -1.290529 | 0.000009  |
| H12 | -3.177027 | -2.301446 | -0.000022 |
| H13 | -4.055863 | -0.803355 | -0.000097 |
| O14 | -0.828048 | 2.680565  | 0.000018  |
| O15 | 3.624817  | -0.413507 | -0.000015 |
| H16 | 4.092478  | 0.437069  | -0.000035 |
| H17 | 1.771319  | -2.279643 | 0.000041  |
